# Supplementary material for: Assessing the medium-term impact of a home-visiting programme on child maltreatment in England: protocol for a routine data linkage study
Source: PubMed Central journal article supplement (PMC5734359; doi:10.1136/bmjopen-2016-015728), 2017-07-13
Supplement: bmjopen-2016-015728.draft_revisions.pdf [file bmjopen-2016-015728.draft_revisions.pdf]

# BMJ Open

## Assessing the medium-term impact of a home-visiting programme on child maltreatment through routine data linkage to a trial cohort: The protocol for the Building Blocks 2-6 study.

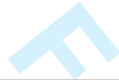

|                                 |                                                                                                                                                                                                                                                                                                                                                                                                                                                                                                                                                                                                                                                                                                                                                                                                                                                                                                                                                                                                                                                                                                                                                                                                             |
|---------------------------------|-------------------------------------------------------------------------------------------------------------------------------------------------------------------------------------------------------------------------------------------------------------------------------------------------------------------------------------------------------------------------------------------------------------------------------------------------------------------------------------------------------------------------------------------------------------------------------------------------------------------------------------------------------------------------------------------------------------------------------------------------------------------------------------------------------------------------------------------------------------------------------------------------------------------------------------------------------------------------------------------------------------------------------------------------------------------------------------------------------------------------------------------------------------------------------------------------------------|
| Journal:                        | <i>BMJ Open</i>                                                                                                                                                                                                                                                                                                                                                                                                                                                                                                                                                                                                                                                                                                                                                                                                                                                                                                                                                                                                                                                                                                                                                                                             |
| Manuscript ID                   | bmjopen-2016-015728                                                                                                                                                                                                                                                                                                                                                                                                                                                                                                                                                                                                                                                                                                                                                                                                                                                                                                                                                                                                                                                                                                                                                                                         |
| Article Type:                   | Protocol                                                                                                                                                                                                                                                                                                                                                                                                                                                                                                                                                                                                                                                                                                                                                                                                                                                                                                                                                                                                                                                                                                                                                                                                    |
| Date Submitted by the Author:   | 23-Dec-2016                                                                                                                                                                                                                                                                                                                                                                                                                                                                                                                                                                                                                                                                                                                                                                                                                                                                                                                                                                                                                                                                                                                                                                                                 |
| Complete List of Authors:       | Lugg-Widger, Fiona; Cardiff University, Centre for Trials Research<br>Cannings John, Rebeca; Cardiff University, Centre for Trials Research<br>Channon, Sue; Cardiff University, Centre for Trials Research<br>Fitzsimmons, Deborah; Swansea University, Swansea Centre for Health Economics<br>Hood, Kerenza; Cardiff University, Centre for Trials Research<br>Jones, Kerina; Swansea University, College of Medicine<br>Kemp, Alison; Cardiff University School of Medicine, Division of Population Medicine<br>Kenkre, Joyce; University of South Wales, 5. Faculty of Life Sciences and Education<br>Longo, Mirella; Cardiff University School of Medicine, Marie Curie Palliative Care Research Centre<br>McEwan, Kirsten; University of Derby, Department of Psychology<br>Moody, Gwenllian; Cardiff University, Centre for Trials Research<br>Owen-Jones, Eleri; Cardiff University, Centre for Trials Research<br>Sanders, Julia; Cardiff University, School of Healthcare Sciences<br>Segrott, Jeremy; Cardiff University, Centre for Trials Research; Cardiff University, DECIPHer Centre, Cardiff School of Social Sciences<br>Robling, Michael; Cardiff University, Centre for Trials Research |
| <b>Primary Subject Heading</b>: | Public health                                                                                                                                                                                                                                                                                                                                                                                                                                                                                                                                                                                                                                                                                                                                                                                                                                                                                                                                                                                                                                                                                                                                                                                               |
| Secondary Subject Heading:      | Health informatics, Paediatrics, Research methods                                                                                                                                                                                                                                                                                                                                                                                                                                                                                                                                                                                                                                                                                                                                                                                                                                                                                                                                                                                                                                                                                                                                                           |
| Keywords:                       | Child maltreatment, Family Nurse Partnership, Early years prevention, Medical Record Linkage, Follow-Up Studies                                                                                                                                                                                                                                                                                                                                                                                                                                                                                                                                                                                                                                                                                                                                                                                                                                                                                                                                                                                                                                                                                             |
|                                 |                                                                                                                                                                                                                                                                                                                                                                                                                                                                                                                                                                                                                                                                                                                                                                                                                                                                                                                                                                                                                                                                                                                                                                                                             |

SCHOLARONE™  
Manuscripts

1  
2  
3 1 Assessing the medium-term impact of a home-visiting programme on child  
4  
5 2 maltreatment through routine data linkage to a trial cohort: The protocol for the  
6  
7 3 Building Blocks 2-6 study.  
8  
9  
10 4

11  
12 5 **Corresponding author**

13  
14 Fiona Lugg-Widger<sup>1</sup> [LuggFV@cardiff.ac.uk](mailto:LuggFV@cardiff.ac.uk) Telephone: 02920687519

15 6 Address: 7th Floor Neuadd Meirionnydd, Heath Park, Cardiff. CF14 4YS.  
16  
17 7

18  
19 Rebecca Cannings-John<sup>1</sup> [CanningsRL@cardiff.ac.uk](mailto:CanningsRL@cardiff.ac.uk)  
20 Sue Channon<sup>1</sup> [ChannonS2@cardiff.ac.uk](mailto:ChannonS2@cardiff.ac.uk)  
21 Deborah Fitzsimmons<sup>2</sup> [D.Fitzsimmons@swansea.ac.uk](mailto:D.Fitzsimmons@swansea.ac.uk)  
22 Kerry Hood<sup>1</sup> [HoodK1@cardiff.ac.uk](mailto:HoodK1@cardiff.ac.uk)  
23 Kerina Jones<sup>3</sup> [k.h.jones@swansea.ac.uk](mailto:k.h.jones@swansea.ac.uk)  
24 Alison Kemp<sup>4</sup> [KempAM@cf.ac.uk](mailto:KempAM@cf.ac.uk)  
25 Joyce Kenkre<sup>5</sup> [joyce.kenkre@southwales.ac.uk](mailto:joyce.kenkre@southwales.ac.uk)  
26 Mirella Longo<sup>6</sup> [LongoM1@cardiff.ac.uk](mailto:LongoM1@cardiff.ac.uk)  
27 Kirsten McEwan<sup>7</sup> [k.mcewan@derby.ac.uk](mailto:k.mcewan@derby.ac.uk)  
28 Gwenllian Moody<sup>1</sup> [MoodyG@cardiff.ac.uk](mailto:MoodyG@cardiff.ac.uk)  
29 Eleri Owen-Jones<sup>1</sup> [Owen-JonesCE@cardiff.ac.uk](mailto:Owen-JonesCE@cardiff.ac.uk)  
30 Julia Sanders<sup>8</sup> [SandersJ3@cardiff.ac.uk](mailto:SandersJ3@cardiff.ac.uk)  
31 Jeremy Segrott<sup>1,9</sup> [SegrottJ@cardiff.ac.uk](mailto:SegrottJ@cardiff.ac.uk)  
32 Michael Robling<sup>1</sup> [RoblingMR@cardiff.ac.uk](mailto:RoblingMR@cardiff.ac.uk)  
33  
34

35 8  
36 9 **Author Affiliations**

- 37  
38 10 1. South East Wales Trials Unit, Centre for Trials Research, Cardiff University, Cardiff, UK.  
39 11 2. Swansea Centre for Health Economics, Swansea University, Swansea, UK  
40 12 3. College of Medicine, Swansea University, Swansea, UK  
41 13 4. Division of Population Medicine, School of Medicine, Cardiff University, Cardiff, UK.  
42 14 5. Faculty of Life Sciences and Education, University of South Wales, Pontypridd, UK  
43 15 6. Marie Curie Palliative Care Research Centre, Cardiff University, Cardiff, UK  
44 16 7. Department of Psychology, University of Derby, UK  
45 17 8. School of Healthcare Sciences, Cardiff University, Cardiff, UK.  
46 18 9. DECIPHer Centre, Cardiff School of Social Sciences, Cardiff University, Cardiff, UK.  
47  
48  
49  
50  
51  
52

53 20 **Word Count:** 4608

54  
55 21 **Keywords:** Child maltreatment, Family Nurse Partnership, Early years prevention,

56  
57 22 Medical Record Linkage, Follow-Up Studies  
58  
59  
60

1  
2  
3 **23 ABSTRACT**  
4

5 **24 Introduction:** Child maltreatment involves acts of omission (neglect) or commission (abuse)  
6  
7  
8 often by caregivers that results in potential or actual harm to a child. The Building Blocks  
9  
10  
11  
12  
13  
14  
15  
16  
17  
18  
19  
20  
21  
22  
23  
24  
25  
26  
27  
28  
29  
30  
31  
32  
33  
34  
35  
36  
37  
38  
39  
40  
41  
42  
43  
44  
45  
46  
47  
48  
49  
50  
51  
52  
53  
54  
55  
56  
57  
58  
59  
60

trial [ISRCTN 23019866] assessed the short-term impact of an intensive programme of antenatal and postnatal visiting by specially trained nurses to support young pregnant women in England. The Building Blocks: 2-6 study will assess the medium-term impacts of the programme for mothers and children (n=1562), through the linkage of routinely collected data to the trial data, with a particular emphasis on the programme's impact upon preventing child maltreatment.

**32 Methods and analysis:** We have developed bespoke model of data linkage whereby  
33  
34  
35  
36  
37  
38  
39  
40  
41  
42  
43  
44  
45  
46  
47  
48  
49  
50  
51  
52  
53  
54  
55  
56  
57  
58  
59  
60

outcome data for the trial cohort will be retrieved by linked anonymous data abstraction from NHS Digital, Office for National Statistics and the Department for Education's National Pupil Database. Participants will be given reasonable opportunity to opt-out of this study prior to data transfer. The information centres will match participants to the information held in their databases using standard identifiers, and send extracts to a third party safe haven. The study will have 80% power to detect a 4% difference (4% vs 8%) for the binary primary outcome of Child in Need status (from birth to key stage one) at a two-sided 5% alpha level by following up 602 children in each trial arm. Analysis will be by intention to treat using logistic multilevel modelling. A cost and consequences analysis will extend the time-frame of the economic analysis from the original trial.

**43 Ethics and Dissemination:** The study protocol has been approved by NHS Wales  
44  
45  
46  
47  
48  
49  
50  
51  
52  
53  
54  
55  
56  
57  
58  
59  
60

Research Ethics Committee and the Health Research Authority's Confidentiality Advisory Group. Methods of innovative study design and findings will be disseminated through peer-review journals and conferences, results will be of interest to clinical and policy stakeholders in the UK.

48

## 49 **Strengths and limitations of this study**

- 50 • This study aims to provide much needed evidence about the medium-term benefits of  
51 the Family Nurse Partnership programme in England. This study has the capacity to  
52 either confirm the current perspective on the value of the intervention or demonstrate  
53 clinically meaningful benefits to children in vulnerable young families.
- 54 • There are distinct benefits associated with using routine data including a reduction in  
55 cost and participant burden over prospectively collected data, and relative  
56 completeness and therefore minimisation of bias over self-report, particularly for such  
57 sensitive outcomes.
- 58 • The establishment of a regulatory secure research database for this cohort of trial  
59 participants also offers the prospect of further data being added over the longer term  
60 and of broadening the scope of the dataset to other outcome domains relevant to this  
61 intervention, such as criminal justice and welfare benefits.
- 62 • The extent of this benefit will be balanced by our ability to adequately access the  
63 data from information centres in a timely fashion, the quality of matching conducted  
64 as well as the quality of the data ultimately retrieved.

## 65 **INTRODUCTION**

### 66 **Maltreatment**

67 Child maltreatment involves acts of omission (neglect) or commission (abuse) often by  
68 caregivers that inflict harm, or fail to act to prevent harm to a child.[1] Abuse may be  
69 physical, emotional or sexual. Neglect represents persistent failure to meet basic physical or  
70 psychological needs, often resulting in serious impairment of the child's health and/or  
71 development.[1] Neglect may involve failing to: protect a child from physical and emotional  
72 harm or danger; provide adequate supervision; or ensure access to appropriate medical  
73 care. In the year ending 31st March 2015 in England there were 635,600 referrals to  
74 children's social care services, 403,400 children starting an episode of need (an overall rate

1  
2  
3  
4  
5  
6  
7  
8  
9  
10  
11  
12  
13  
14  
15  
16  
17  
18  
19  
20  
21  
22  
23  
24  
25  
26  
27  
28  
29  
30  
31  
32  
33  
34  
35  
36  
37  
38  
39  
40  
41  
42  
43  
44  
45  
46  
47  
48  
49  
50  
51  
52  
53  
54  
55  
56  
57  
58  
59  
60

75 of 348.0 per 10,000) and 62,200 children became subject of a child protection plan.[2] Of  
76 children who became subject of a child protection plan, the most common initial category of  
77 abuse was neglect (43.2%) followed by emotional abuse (33.7%).

### 78 **Family Nurse Partnership home-visiting programme**

79 There has been increasing emphasis upon the primary prevention of child maltreatment,  
80 including interventions directed at general populations and those targeting high-risk  
81 groups.[3] One such intervention is the Family Nurse Partnership (FNP) programme  
82 (developed in the US as the Nurse Family Partnership or NFP) – a home-visiting approach  
83 with three overarching goals: to improve birth outcomes, optimise child health and  
84 development - including reducing maltreatment - and promote economic self-sufficiency of  
85 mothers.[4]

86 In three US trials (in Elmira, Memphis and Denver),[5-7] the NFP has demonstrated  
87 improvements in prenatal health behaviours and birth outcomes, sensitive child care,  
88 maternal life course (e.g. greater workforce participation) and child and adolescent  
89 functioning. It has also shown positive effects in relation to reductions in rates of child  
90 injuries, abuse and neglect. In the first US trial in 1977, a sub-group analysis of poor  
91 unmarried teens (54 families) revealed that by age 2 there was verified abuse / neglect in  
92 19% of control children compared to 4% in the group in receipt of NFP in both pregnancy  
93 and infancy (treatment difference of 0.15, 95% confidence interval of -0.01 to 0.31) and 56%  
94 relative reduction in emergency department encounters for injuries and ingestions during the  
95 second year of life.[5] Amongst the sub-group of children (56 families) with a state-verified  
96 report of maltreatment by age 4, the NFP group of children exhibited fewer risks for harm  
97 than the control group (e.g. fewer attendances with injuries / ingestions, safer home  
98 environment) at follow-up points between 25 and 50 months of life.[8] This was considered  
99 to be due to the earlier and more comprehensive detection of maltreatment by nurse-visited  
100 families.

1  
2  
3 101 The NFP programme was adapted for implementation as the Family Nurse Partnership and  
4  
5 102 was introduced in England in 2007. Our Building Blocks trial (ISRCTN23019866) was the  
6  
7 103 first trial of FNP in England and evaluated short-term outcomes to age 2 – the duration of the  
8  
9 104 FNP programme.[9] The trial reported no difference for four primary outcomes: biomarker-  
10  
11 105 calibrated self-reported tobacco use by the mother at late pregnancy, birth weight of the  
12  
13 106 baby, the proportion of women with a second pregnancy within 24 months post-partum, and  
14  
15 107 emergency attendances and hospital admissions for the child within 24 months post-  
16  
17 108 partum.[10] We observed some differences for secondary child development outcomes  
18  
19 109 including the rate of safeguarding events reported in primary care records. While the current  
20  
21 110 evidence does not support continuation of the programme in England, previous evaluations  
22  
23 111 have demonstrated benefit over the longer-term (e.g. up to 15 years of age).[11] For  
24  
25 112 maltreatment outcomes this benefit has been increasingly evident after age 4 years,[12]  
26  
27 113 therefore, the current study will establish whether FNP has moderated maltreatment  
28  
29 114 outcomes over a medium-term period of follow-up (i.e. to the point where the child is aged  
30  
31 115 six years old).

## 35 116 **METHODS AND ANALYSIS**

### 38 117 **Research objective**

40 118 The Building Blocks: 2-6 Study will use data linkage of routinely collected national datasets  
41  
42 119 to assess the medium-term impact of the FNP intervention upon child maltreatment  
43  
44 120 outcomes and key indicators of neglect.

### 47 121 **Study design**

50 122 This is a data linkage study, which will generate a linked anonymised database hosted by an  
51  
52 123 independent Trusted Third Party (TTP). Participant mothers and children from Building  
53  
54 124 Blocks: 0-2 (BB:0-2) will be followed up for a further four years using routine data only. Data  
55  
56 125 from various routine public sector sources will be retrieved and linked to the trial data to  
57  
58  
59  
60

1  
2  
3 126 enable children and mothers to be followed until the child reaches key stage one (the two  
4  
5 127 years of schooling when pupils are aged between 5 and 7). A summary of the data sources  
6  
7 128 is provided in Table 1 and the time points for each dataset are shown in Figure 1. Study  
8  
9 129 outcomes are summarised in Table 2.

10  
11 130  
12  
13  
14  
15  
16  
17  
18  
19  
20  
21  
22  
23  
24  
25  
26  
27  
28  
29  
30  
31  
32  
33  
34  
35  
36  
37  
38  
39  
40  
41  
42  
43  
44  
45  
46  
47  
48  
49  
50  
51  
52  
53  
54  
55  
56  
57  
58  
59  
60

For peer review only

131 Table 1. Summary of data sources

| BB: 0-2 | BB: 2-6        | Provided by                             | Dataset           | Time period* | Eligibility / Coverage                                                                    | Mother | Child | Indicative / key data items                                                                                                       |
|---------|----------------|-----------------------------------------|-------------------|--------------|-------------------------------------------------------------------------------------------|--------|-------|-----------------------------------------------------------------------------------------------------------------------------------|
| ✓       |                | Trial participants maternal self-report | Baseline          | 2009-2013    | Trial participants                                                                        | Yes    | No    | Socioeconomic; Maternal health & well-being; Health behaviour; pregnancy complications, Neonatal outcomes; Feeding & development. |
| ✓       | Late Pregnancy |                                         |                   |              |                                                                                           |        |       |                                                                                                                                   |
| ✓       | 6 month        |                                         | Post-birth        |              |                                                                                           |        |       |                                                                                                                                   |
| ✓       | 12 month       |                                         |                   |              |                                                                                           |        |       |                                                                                                                                   |
| ✓       | 18 month       |                                         |                   |              |                                                                                           |        |       |                                                                                                                                   |
| ✓       |                | 24 month                                |                   |              |                                                                                           |        |       |                                                                                                                                   |
| ✓       |                | Maternity records                       | Maternal outcomes | 2009-2010    | UK                                                                                        | Yes    | Yes   | Maternal health & well-being; Neonatal outcomes                                                                                   |
| ✓       |                | GP records                              | GP consultations  | 2009-2013    | UK                                                                                        | Yes    | Yes   | Immunisations; safeguarding                                                                                                       |
| ✓       |                | PCTs                                    | Immunisation      | 2009-2013    | England                                                                                   | No     | Yes   | Immunisations                                                                                                                     |
| ✓       | ✓              | DoH                                     | Abortions         | 2009-2013    | England and Wales<br>All abortions performed in the NHS or an approved independent sector | Yes    | No    | Abortions                                                                                                                         |
| ✓       | ✓              | ONS                                     | Mortality records | 2009 - 2017  | UK                                                                                        | Yes    | Yes   | Mortality data                                                                                                                    |
| ✓       | ✓              | NHS Digital / HES                       | Inpatient;        | 2009 - 2017  | Any NHS hospital in England                                                               | Yes    | Yes   | Injuries and ingestions; subsequent pregnancies;                                                                                  |
| ✓       | Outpatient;    |                                         |                   |              |                                                                                           |        |       |                                                                                                                                   |
| ✓       | A&E            |                                         |                   |              |                                                                                           |        |       |                                                                                                                                   |
|         | ✓              | Dept. for Education / NPD               | CIN;              | 2009 - 2017  | < 18 years<br>Registered with social services in England                                  | Yes    | Yes   | Child in need status and child looked after status                                                                                |
|         | ✓              |                                         | CLA               |              |                                                                                           |        |       |                                                                                                                                   |
|         | ✓              |                                         | EYFSP             | 2013-2017    | Public Schools in England                                                                 | No     | Yes   | Indicators of maltreatment; educational development and attainment; eligible for free school meals;                               |
|         | ✓              |                                         | Census            |              |                                                                                           |        |       |                                                                                                                                   |
|         | ✓              |                                         | Alt Provision     |              |                                                                                           |        |       |                                                                                                                                   |
|         | ✓              |                                         | PRU               |              |                                                                                           |        |       |                                                                                                                                   |
|         | ✓              |                                         | Key stage One     | 2016-2017    |                                                                                           | No     | Yes   |                                                                                                                                   |

132 \*Trial started 2009; 2 year follow up ended 2013; 6 year follow up ends in 2017. PCTs – Primary Care Trusts ONS- Office for National  
 133 Statistics; HES-Hospital Episode statistics; NPD-national pupil database; CIN-child in need; CLA-child looked after; PRU-pupil referral unit;  
 134 EYFSP-Early Years Foundation Stage Profile DoH – Department of Health



135 Table 2. Study Outcomes

| Domains                                                                                   | Outcomes                            | HES | ONS | NPD |
|-------------------------------------------------------------------------------------------|-------------------------------------|-----|-----|-----|
| <i>Primary:</i><br>Child in Need status recorded at any time during the follow-up period. | CIN status as of 31 March each year |     |     | ✓   |
| <i>Secondary:</i>                                                                         |                                     |     |     |     |
| (i) Objective measures of maltreatment                                                    | Child Protection registration       |     |     | ✓   |
|                                                                                           | Details of a child protection plan  |     |     | ✓   |
|                                                                                           | CIN categorisation                  |     |     | ✓   |
|                                                                                           | CIN duration                        |     |     | ✓   |
|                                                                                           | Looked after status                 |     |     | ✓   |
|                                                                                           | CLA period of care                  |     |     | ✓   |
|                                                                                           | Legal status of CLA                 |     |     | ✓   |
|                                                                                           | Cause of death                      |     | ✓   |     |
| (ii) Associated measures of maltreatment                                                  | DNA appointments                    | ✓   |     |     |
|                                                                                           | Injuries and ingestions             | ✓   |     |     |
| (iii) Intermediate FNP programme outcomes                                                 | Subsequent pregnancies              | ✓   |     |     |
| (iv) Costs                                                                                | Health and Social Care resource use | ✓   |     | ✓   |
| (v) Child health, developmental and educational outcomes                                  | Special Educational Needs           |     |     | ✓   |
|                                                                                           | Disability                          | ✓   |     | ✓   |
|                                                                                           | Day care attendance                 |     |     | ✓   |
|                                                                                           | Early Years assessment              |     |     | ✓   |
|                                                                                           | School attendance                   |     |     | ✓   |
|                                                                                           | Key stage one attainment            |     |     | ✓   |

136 CIN – Child in Need; CLA – Child Looked After; DNA – Did not attend; FNP – Family Nurse  
 137 Partnership; HES – Hospital Episode Statistics; NPD – National Pupil Database; ONS –  
 138 Office for National Statistics

139

140 **Data providers and datasets**

141 The BB:0-2 Trial Data

142 Data collected for the initial trial will be used in the present study.[9-10] A baseline home  
 143 assessment was conducted upon trial entry using Computer-Assisted Personal Interview  
 144 (CAPI). Follow-up was by computer-assisted telephone interview (CATI) at 34-36 weeks  
 145 gestation and 6, 12 and 18 months postnatal. A final home-based CAPI was conducted at 2  
 146 years after birth. Several routinely collected datasets were accessed and data obtained from  
 147 the following sources: maternity records (medical and obstetric history items, antenatal

1  
2  
3 148 attendances and maternal and neonatal outcomes), primary care notes for each mother and  
4  
5 149 child dyad (consultations, immunisations, pregnancies, safeguarding), abortions data from  
6  
7 150 the Department of Health Abortions Statistics Team, and immunisation data via COVER  
8  
9 151 (Cover of Vaccination Evaluated Rapidly) contacts.

10  
11  
12 152 NHS Digital

13  
14 153 The Hospital Episode Statistics (HES) datasets hold records on over 125 million hospital  
15  
16 154 admissions, outpatient and accident and emergency episodes each year. Data can be  
17  
18 155 requested from NHS Digital (formerly known as the Health and Social Care Information  
19  
20 156 Centre), the executive non-departmental public body established under the Health and  
21  
22 157 Social Care Act 2012.[13] All available records belonging to cohort members (mothers and  
23  
24 158 children) will be obtained from study entry of the mother, which occurred between June 2009  
25  
26 159 and July 2010 until the date the child turns six. The data requested include diagnoses,  
27  
28 160 procedures, length of episode and external causes of injuries coded according to the 10<sup>th</sup>  
29  
30 161 revision of the International Statistical Classification of Diseases and Related Health  
31  
32 162 Problems [ICD-10] codes.[14]

33  
34  
35 163 NHS Digital has responsibility for collecting these data from across the health and social  
36  
37 164 care system to allow NHS hospitals to be paid for the care they deliver. At the end of the  
38  
39 165 financial year (March) a final dataset is collated. This dataset is cleaned and validated  
40  
41 166 before being available for research at the end of the year (December).

42  
43  
44 167 Office for National Statistics (ONS)

45  
46  
47 168 The Office for National Statistics (ONS) collects information on cause of death from civil  
48  
49 169 registration records. Mortality data can be accessed through NHS Digital. For registered  
50  
51 170 deaths, the underlying cause of death is derived from the sequence of conditions leading  
52  
53 171 directly to the death and is recorded on the death certificate. Deaths are subsequently coded  
54  
55 172 in line with the ICD-10.

1  
2  
3 173 Department for Education (DfE)  
4

5 174 The Department for Education (DfE) holds information on pupils throughout the different  
6  
7 175 phases of education. Records are sourced from publicly funded schools, local authorities  
8  
9 176 and awarding bodies and held in the National Pupil Database (NPD). Datasets are available  
10  
11 177 on various aspects of education such as school census data, absence data, and school  
12  
13 178 attainment.[15] All available records for the children in the cohort will be obtained from the  
14  
15 179 various datasets held. The data requested includes the number of hours attended, early  
16  
17 180 educational development, eligibility for free school meals, and special educational needs  
18  
19 181 (SEN) provision type. Datasets are collated throughout the year and are available at set  
20  
21 182 time points annually.  
22  
23

24 183 Social Care Data  
25

26  
27 184 Social care data from local authorities is available through the NPD via two datasets, Child in  
28  
29 185 Need (CIN) and Child Looked After (CLA). The CIN census captures individual level  
30  
31 186 information on children referred to and assessed by children's social care services within  
32  
33 187 each 12month period.[16] CLA is collected in the SSDA903 return – an annual statutory  
34  
35 188 data collection for all local authorities.[17] Any child in the cohort who is in one of these  
36  
37 189 datasets will be identified. Mothers who were <18 years at the time of participation in the  
38  
39 190 BB:0-2 trial will also be identified in these datasets.  
40  
41

42 191 **Study participants: Inclusion and exclusion criteria**  
43

44  
45 192 Eligible participants are those mothers and children exiting the BB:0-2 trial. Women were  
46  
47 193 recruited as nulliparous women aged 19 or under, living in one of 18 local authority FNP  
48  
49 194 catchment areas; recruited by 24<sup>+6</sup> weeks gestation, have conversational level of English  
50  
51 195 and were able to consent to research.[10]  
52

53 196 Children in medium-term foster placements or adopted within the six year study period can  
54  
55 197 be linked up to the date of adoption. Maternal or child death will be captured as an outcome.  
56  
57  
58  
59  
60

1  
2  
3 198 **Recruitment / Dissent**  
4

5 199 Participants previously consented to enter into the BB:0-2 trial and provide self-report and  
6  
7 200 access to their routine records for the period up to two years postpartum. In order to obtain  
8  
9 201 an unbiased estimate of the medium-term effect of FNP on objective and associated  
10  
11 202 maltreatment outcomes we have received section 251 (s251) support of the 2006 NHS Act  
12  
13 203 approval from the Health Research Authority's Confidentiality Advisory Group (HRA CAG) to  
14  
15 204 pass identifiable participant data legally held by Cardiff University to the information centres  
16  
17 205 (IC) to link to routine data. This is without obtaining further consent from participants,  
18  
19 206 instead using an opt-out/dissent model.  
20

21  
22 207 Justification of approach  
23

24  
25 208 Consent for longer-term follow-up (i.e. beyond 24 months postpartum) was originally  
26  
27 209 proposed in the BB:0-2 trial. However, upon ethical review it was considered that greater  
28  
29 210 specificity about exact outcomes than could be provided at recruitment was required.  
30  
31 211 Additionally, providing meaningful consent for much longer follow-up was also challenging,  
32  
33 212 particularly on behalf of yet to be born children.  
34

35 213 Developing the opt-out approach was necessary due to (i) the child protection focus of the  
36  
37 214 study and the consequent sensitivity and impracticality in asking directly for consent, (ii) the  
38  
39 215 mobility and relative difficulty in ongoing direct access to these participants (iii) the  
40  
41 216 consequent introduction of non-ascertainment bias on sample representativeness – resulting  
42  
43 217 in a non-random sample, and (iv) the likely cost and logistical requirements of securing even  
44  
45 218 modest levels of additional consent.  
46

47  
48 219 Methods of notifying participants  
49

50  
51 220 We discussed the issue of dissent and fair processing with the HRA CAG and have  
52  
53 221 subsequently attempted to contact all mothers recruited to the original BB:0-2 trial to inform  
54  
55 222 them that medium-term follow-up using anonymised records will be undertaken.  
56  
57  
58  
59  
60

1  
2  
3 223 Details of participants' residential addresses were updated using their most recent address  
4  
5 224 registered with their GP. Where available, mobile number and email addresses collected  
6  
7 225 for the trial were used to send SMS and emails to participants. All three modes of contact  
8  
9 226 were used over a two-day period and participants were provided with a two-month window in  
10  
11 227 which to contact the project team to discuss the project and opt-out if they wished. A  
12  
13 228 website was also available with the same information which directed participants to contact  
14  
15 229 the project team if they wished.

### 16 17 18 230 *Development of opt-out letter*

19  
20 231 A group of care-experienced young people (CASCADE Voices)[18] advised on the layout,  
21  
22 232 wording and tone of a letter to be sent to all participants. A key consideration was to  
23  
24 233 communicate the focus of this follow-on study in a sensitive manner. The final letter was  
25  
26 234 approved by both an NHS Research Ethics Committee and CAG committee as part of  
27  
28 235 overall governance approval for the study. The letter contained both information on the trial,  
29  
30 236 the follow-on study and a flowchart for what to do if women wished to discuss the project  
31  
32 237 and/or opt out.

### 33 34 35 238 *Process to manage dissent*

36  
37 239 Women notifying the study team of their dissent will be recorded as "opted out", removed  
38  
39 240 from all project datasets for this follow-up work and identifiable datasets to be sent to ICs.  
40  
41 241 They will not be included in any of the datasets or analyses for this follow-on study.

### 42 43 44 242 **Governance and compliance**

45  
46 243 Following Ethical approval (14/WA10062) and s251 support (CAG 10-08(b)/2014), data  
47  
48 244 request applications were submitted to DfE, NHS Digital and ONS.

49  
50  
51 245 In order to satisfy the requirements of the s251 support and NHS Digital contract, the  
52  
53 246 Information Governance (IG) Toolkit self-assessment[19] (commissioned by the Department  
54  
55 247 for Health for NHS Digital to develop and maintain) was required. This organisation-level  
56  
57 248 assessment provides reassurance of satisfactory information governance within the host  
58  
59  
60

1  
2  
3 249 trials unit. Both the s251 support and IG Toolkit are assessed and renewed on an annual  
4  
5 250 basis. The opt-out model was also required to satisfy s251 support as well as the DfE  
6  
7 251 assessment of compliance with principle one of the Data Protection Act 1998. Governance  
8  
9 252 and IC requirements prior to application approval are shown in Figure 2.

### 11 253 **Data matching**

12  
13  
14 254 Maternal and child identifiers will be sent to both NHS Digital and DfE for matching with their  
15  
16 255 databases. Each IC holds differing identifiers including a unique identifier for each individual  
17  
18 256 (NHS Number; Unique Pupil Number UPN).

19  
20  
21 257 Matching with HES data will be by exact matching on NHS Number; Date of Birth; Postcode  
22  
23 258 and Gender. This was conducted for BB:0-2 and achieved a high match rate where 99.6%  
24  
25 259 of mothers and babies' records were matched fully (i.e. matched on all identifiers provided)  
26  
27 260 or partially (i.e. matched on a reduced, but acceptable number of identifiers provided). This  
28  
29 261 will be repeated for this study. NHS Digital will then exact match with ONS using NHS  
30  
31 262 number in order to obtain mortality data.

32  
33  
34 263 As the NPD does not include NHS numbers, initially exact matching on first name and  
35  
36 264 surname, date of birth and postcode (of both mother and child for social care data; all other  
37  
38 265 datasets just child) will be undertaken. Further matching required will be by fuzzy matching  
39  
40 266 of first name. The CIN and CLA datasets do not contain names or postcodes therefore the  
41  
42 267 matching will be in two phases: i) Participants will be matched with the NPD, the UPN added  
43  
44 268 to all participants and ii) this will be used to identify individuals in the CIN and CLA datasets.

45  
46 269 Data matching at DfE and NHS Digital/ONS are independent therefore match rates at the  
47  
48 270 participant level are expected to vary (some may match to NPD but not HES). Educational  
49  
50 271 records should be available for all children in the trial cohort whereas health and social care  
51  
52 272 derived data will only exist where the child has received a relevant episode of care.  
53  
54 273 Participants will be compared using trial baseline data to check for any bias between those  
55  
56  
57  
58  
59  
60

1  
2  
3 274 who are matched and not-matched for those datasets where they would all be expected to  
4  
5 275 be present (e.g. school census for all children).  
6

7  
8 276 The Pseudonymised Dataset

9  
10 277 A unique study ID will be attached to each participant's record prior to data transfer to ICs.

11  
12 278 Once ICs have matched records to their database, only the unique study ID is retained.

13  
14 279 Data extracts from both ICs plus data files from the trial (following a process of de-

15  
16 280 identification and standardisation in Cardiff to reduce risk of later unintentional participant

17  
18 281 level identification) will all be securely transferred to a data safe haven,[20] the Secure

19  
20 282 Anonymised Information Linkage (SAIL) databank, for linking and storage. The data flow is

21  
22 283 shown in Figure 3.  
23

24  
25 284 A SAIL data analyst will re-assign the study ID with a new anonymous linking field [ALF] and

26  
27 285 store the corresponding ID in a separate encrypted password protected file.[21]  
28

29  
30 286 Participants will not be identifiable to the study team, or to the SAIL analyst, but incoming

31  
32 287 datasets can be linked at the individual level using the ALF. The study team will have

33  
34 288 controlled remote access to these data thus ensuring the security of the pseudonymised

35  
36 289 database.[22] All data cleaning and analysis will be carried out via the remote portal by the

37  
38 290 study data manager and statistician.  
39

40  
41 291 Data from NHS Digital and NPD will be requested at two time points. The first data extract

42  
43 292 will confirm the data flow model, assess data quality and the suitability of data for answering

44  
45 293 key study analyses. The second data request will be made once all children in the study

46  
47 294 have reached key stage one (April 2017) and on which the study findings will be reported on

48  
49 295 (in 2018).  
50

51 296  
52  
53  
54  
55  
56  
57  
58  
59  
60

1  
2  
3 297 Control of data  
4

5 298 Cardiff University control under contract the identifiable trial data that are being transferred to  
6  
7 299 the ICs and to the safe haven. Data held by NHS Digital, ONS and DfE, for which they are  
8  
9 300 the controllers, are de-identified and then sent to SAIL to be linked and held (including the  
10  
11 301 de-identified trial data) in a secure anonymised standalone database for use by nominated  
12  
13 302 study team members. SAIL will control the safe haven environment, and will process the  
14  
15 303 pseudonymised data for secure use by study team. Cardiff University will control the  
16  
17 304 purposes to which the data are put in answering research questions as per the study  
18  
19 305 protocol. Once linked in the data safe haven, the ability to submit queries to each IC about  
20  
21 306 individual records will be more limited than if identifiable data were returned to the research  
22  
23 307 team in Cardiff. Data cleaning will remain possible however as will generic queries about  
24  
25 308 data provided in batch. The quality of matching conducted by NPD and NHS Digital/ONS will  
26  
27 309 be a key factor in the success of the study.  
28  
29  
30

## 31 **Analysis**

32  
33  
34  
35 311 Power Calculation  
36

37 312 Primary outcome (CIN status at any point between birth and six years): For CIN status,  
38  
39 313 available UK data on rates are not specific to the age-range of interest, but the rate in the  
40  
41 314 general population aged 5-9 years is 4.6% (for local authorities comprising study sites in  
42  
43 315 BB:0-2). The rate would be expected to be greater in the specific study sample, and  
44  
45 316 therefore we have assumed a rate of 8%. To detect a difference of 4% (FNP: 4% vs Usual  
46  
47 317 Care: 8%) would require 602 children in each arm (1204 in total) using 80% power and a  
48  
49 318 two-sided 5% alpha level.  
50

51  
52 319

53  
54  
55 320 BB:0-2 recruited 1645 women, with 1562 available for follow-up (i.e. excluding those subject  
56  
57 321 to a mandatory withdrawal). Follow-up through medical records (assuming 10% loss in  
58  
59  
60



1  
2  
3 322 tracking & linkage) would result in 1405 participants, thus securing enough data to test the  
4  
5 323 primary outcome and the key secondary outcome  
6

7  
8 324 Main analysis  
9

10 325 Analyses will be conducted on an intention-to-treat basis and due emphasis placed on  
11  
12 326 confidence intervals for the between-arm comparisons. Descriptive statistics of demographic  
13  
14 327 and baseline measures will be used to ascertain any marked imbalance between the trial  
15  
16 328 arms. The primary comparative analysis on CIN status at any point between birth and six  
17  
18 329 years will use logistic multilevel modelling to investigate differences between the groups,  
19  
20 330 and odds ratios alongside 95% confidence intervals (CIs) will be reported. Multilevel  
21  
22 331 modelling will allow for clustering of effect within a site and family nurse. Modelling the  
23  
24 332 impact of key subgroups and different intervention elements (e.g. gestational age at  
25  
26 333 programme entry, dosage) on outcome will be undertaken by extending the primary models  
27  
28 334 and testing for interaction effects. The role of potential moderators of programme effect (e.g.  
29  
30 335 domestic violence) will also be explored.  
31  
32

33  
34 336 Although the study will be powered to examine a 4% difference in CIN status, secondary  
35  
36 337 analyses will assess group differences in referral rates to CSC, maltreatment profile, and  
37  
38 338 child protection outcomes. Levels of concern will be examined by looking at extent of action  
39  
40 339 taken. A state transition model using Markov chains will be used to assess the probabilities  
41  
42 340 of moving from one stage marker (states) to another.[23] The transition probabilities (the  
43  
44 341 probability of the various state-changes) in our model will be derived from our data and  
45  
46 342 compared between groups.  
47

48  
49 343 Bias in the followed-up BB:2-6 sample will be quantified by examining group differences  
50  
51 344 (participants and non-participants) in baseline variables such as age, deprivation, gestational  
52  
53 345 age, and education. Surveillance bias in detection of maltreatment during the child's infancy  
54  
55 346 and toddlerhood can be assessed by examining subsequent reporting.[24] The duration  
56  
57 347 between birth and the date of first referral to CSC will be calculated and group differences  
58  
59  
60

1  
2  
3 348 examined using Cox regression analysis to calculate hazard ratios for referral, together with  
4  
5 349 95% CIs. Surveillance bias is most likely to occur during the intervention phase, although  
6  
7 350 improved handover to other services at 2 years may lead to higher identification in the  
8  
9 351 following year. Severity of the referral will also be compared between the two groups (an  
10  
11 352 approach used in US trials of NFP to explore surveillance bias).

### 13 353 Health economics

14  
15 354 The economic evaluation will consider costs and consequences of the FNP over the full  
16  
17 355 follow-up period (BB:0-2 & BB:2-6). The current BB:0-2 study reported 1) a within trial cost  
18  
19 356 utility analysis assessing NHS costs against quality adjusted life years (QALY) from the  
20  
21 357 perspective of the mother, and 2) a within trial cost consequences analysis relating all costs  
22  
23 358 (including those to the social care, education and criminal justice sectors as well as health)  
24  
25 359 against the full range of effects.[10] Cost and consequences framework is deemed the most  
26  
27 360 appropriate economic evaluation framework for public health interventions[26] and preferred  
28  
29 361 by NICE[27] because it enables to capture equity consideration as well as intersectoral costs  
30  
31 362 and consequences[28] yet applications are still limited.[26]

32  
33  
34 363 The absence of additional data on Health Related Quality of Life within the BB2 study means  
35  
36 364 that it will not be possible to estimate QALYs beyond 24 months postpartum and hence  
37  
38 365 extend the within trial cost utility analysis. However, the within trial cost consequences  
39  
40 366 analysis will be extended from 0-2 to 0-6 years through collection of resource use data from  
41  
42 367 medical and education records (including from the latter, data related to social care usage).  
43  
44 368 These will be summarised against the range of outcomes collected within BB2 without  
45  
46 369 aggregation to allow weighing up changes in the various outcomes reported in BB2 against  
47  
48 370 the changes in costs in a consistent and transparent manner.[29] This will contribute to  
49  
50 371 providing more robust and valid medium-term estimates within the extended period.

51  
52  
53 372

## 54 373 **ETHICS AND DISSEMINATION**

### 55 374 **Legal & Ethical considerations**

56  
57  
58  
59  
60

1  
2  
3 375 The potential for using routine data in health and social care research has been greatly  
4  
5 376 publicised and study designs utilising these data are encouraged by funders.[30] There are,  
6  
7 377 however, many inherent challenges in working with secondary-use data, in particular for this  
8  
9 378 project the ethical and legal requirements/responsibilities which have fundamentally  
10  
11 379 informed this study design.

12  
13 380 Although BB:0-2 linked trial data to HES and ONS data via NHS Digital, the governance  
14  
15 381 requirements around the two applications have differed between the two studies not least  
16  
17 382 because of the difference in consent models. Trial data were provided by NHS Digital and  
18  
19 383 ONS after participant consent to prospective collection and for specified purposes limited to  
20  
21 384 the time-frame of that study. The current follow-on study uses a dissent model under which  
22  
23 385 we are only able to send trial participant identifiers to ICs for matching to outcome data  
24  
25 386 records if there is no objection received from mothers. The study will require all clinical,  
26  
27 387 social and educational data to be held in a data safe haven using encrypted record  
28  
29 388 identifiers and analysis via a securely managed and monitored remote portal. The legal  
30  
31 389 bases for transfer of identifiable data to ICs without explicit consent are as follows; s251 of  
32  
33 390 the 2006 NHS Act 2006 for HES data from NHS Digital, s42(4) of the Statistics and  
34  
35 391 Registration Service Act 2007 through NIHR funding for ONS data via NHS Digital, and 6(1)  
36  
37 392 of Schedule 2 of the 1998 Data Protection Act for NPD data.

38  
39  
40 393 *Dissemination of findings* The Building Blocks: 2-6 Study will generate policy-relevant  
41  
42 394 findings describing the medium-term impact of FNP on measurements of child maltreatment.  
43  
44 395 The findings will also include other policy relevant outcomes from the programme such as  
45  
46 396 health care use, education attainment and changes in social care use over the 6 years of  
47  
48 397 follow up. Such medium-term evaluation remains important as some outcomes for the  
49  
50 398 intervention are expected to arise only after the child's second birthday, including  
51  
52 399 maltreatment. This study will either confirm the largely negative trial findings from BB:0-2  
53  
54 400 further weakening the justification for FNP Programme continuation or provide a balance to  
55  
56 401 the early measurable outcomes.

1  
2  
3 402 In addition to reporting the findings to the funder for this study, the funder for the BB:0-2 trial  
4  
5 403 (DH Policy Research Programme) will also be informed and the FNP National Unit (FNPNU).  
6  
7 404 All local authorities in England will be notified of the results, as (since October 2015) they  
8  
9 405 have responsibility for commissioning public health services for children aged 0-5.  
10  
11 406 Participants will receive a summary of the results and all reports and publications will be  
12  
13 407 made publicly available in full on the Cardiff University website. The research team have  
14  
15 408 previously convened and met twice with a stakeholder group, including relevant policy leads  
16  
17 409 from each country in the UK delivering FNP (England, Scotland, Northern Ireland). We will  
18  
19 410 stage a similar event to present and discuss the implications for practice and policy of the  
20  
21 411 results of this medium-term follow up of participants.  
22

23  
24 412 In addition to policy and public outputs, academic outputs will include (i) this protocol paper  
25  
26 413 providing visibility of this medium-term follow up, (ii) a methods paper describing the piloting  
27  
28 414 process of the study (including data quality and success of data matching) and (iii) main  
29  
30 415 study findings. We aim to disseminate in high-quality, peer reviewed journals and present in  
31  
32 416 key conferences.  
33

34 417 A particular benefit of this study is understanding of, and learning from, the governance  
35  
36 418 challenges. There is potential to use this method for future trials looking at longer term  
37  
38 419 follow-up. Therefore this study has the potential to add to the understanding of routine data  
39  
40 420 and data linkage methods in future public health and clinical trials and these planned  
41  
42 421 publications will provide a basis for the dissemination of the success of these methods.  
43  
44

45 422

## 423 **Declarations**

### 424 *List of abbreviations*

|                                              |
|----------------------------------------------|
| ALF: anonymous linking field;                |
| ALF-E: encrypted ALF;                        |
| BB:0-2: Building Blocks trial;               |
| CAPI: computer-assisted personal interview;  |
| CATI: computer-assisted telephone interview; |
| CIN: Child in Need;                          |

|    |                                                                      |
|----|----------------------------------------------------------------------|
| 1  |                                                                      |
| 2  |                                                                      |
| 3  | CLA: Child Looked After;                                             |
| 4  | DfE: Department for Education;                                       |
| 5  | DNA: Did not attend;                                                 |
| 6  | DoH: Department of Health;                                           |
| 7  | EYFSP: Early Years Foundation Stage Profile;                         |
| 8  | FNP: Family Nurse Partnership;                                       |
| 9  | FNPNU: Family Nurse Partnership National Unit;                       |
| 10 | HES: Hospital Episode Statistics;                                    |
| 11 | HRA CAG: Health Research Authority's Confidentiality Advisory Group; |
| 12 | HSCIC: Health and Social Care Information Centre;                    |
| 13 | IC: information centres;                                             |
| 14 | IG: Information Governance ;                                         |
| 15 | NFP: Nurse Family Partnership;                                       |
| 16 | NPD: National Pupil Database;                                        |
| 17 | ONS: Office for National Statistics;                                 |
| 18 | PCT: Primary Care Trusts;                                            |
| 19 | PRU: pupil referral unit;                                            |
| 20 | QALY: Quality adjusted life years;                                   |
| 21 | s251: Section 251 of the NHS 2006 Act;                               |
| 22 | SAIL: Secure Anonymised Information Linkage;                         |
| 23 | SEN: special educational needs;                                      |
| 24 | TTP: trusted third party;                                            |
| 25 | UPN: Unique Pupil Number.                                            |
| 26 |                                                                      |
| 27 |                                                                      |

425

426 *Ethics approval and consent to participate* - Ethics approval of the study has been given by  
 427 the Research Ethics Committee for Wales (14/WA10062) and the transfer and use of  
 428 identifiable data has been approved by the Health Research Authority [HRA] Confidentiality  
 429 Advisory Group [CAG] (CAG 10-08(b)/2014).

430 *Consent for publication* - Not Applicable

431 *Availability of data and material* - Not Applicable

432 *Competing interests* - The authors declare that they have no competing interests

433 *Funding* - This project was funded by the National Institute for Health Research Public  
 434 Health Research (NIHR PHR) Programme (project number 11/3002/11). The views and  
 435 opinions expressed therein are those of the authors and do not necessarily reflect those of  
 436 the NIHR PHR Programme or the Department of Health.

437 *Authors' contributions*

1  
2  
3 438 MR is the chief investigator of the study. All authors have contributed to and are responsible  
4  
5 439 for the final design of the study. FLW and GM are responsible for study and data  
6  
7 440 management. RCJ is responsible for statistical planning and for data analysis. DF is  
8  
9 441 responsible for the health economics. All authors read and approved the final manuscript.

10  
11 442

12  
13  
14 443 **Acknowledgements**

15  
16 444 The South East Wales Trials Unit is funded by Health and Care Research Wales. The work  
17  
18 445 was undertaken with the support of The Centre for the Development and Evaluation of  
19  
20 446 Complex Interventions for Public Health Improvement (DECIPHer), a UKCRC Public Health  
21  
22 447 Research Centre of Excellence. Joint funding (MR/KO232331/1) from the British Heart  
23  
24 448 Foundation, Cancer Research UK, Economic and Social Research Council, Medical  
25  
26 449 Research Council, the Welsh Government and the Wellcome Trust, under the auspices of  
27  
28 450 the UK Clinical Research Collaboration, is gratefully acknowledged.

29  
30  
31 451

32  
33  
34 452 **References**

35  
36 453 1 A guide to inter-agency working to safeguard and promote the welfare of children. In:  
37  
38 454 Working together to safeguard children. Department for Children Schools and Families.  
39  
40 455 2010.  
41  
42 456 <http://webarchive.nationalarchives.gov.uk/20130401151715/https://www.education.gov.uk/publications/eorderingdownload/00305-2010dom-en-v3.pdf> Accessed Dec 2014.  
43  
44 457  
45  
46 458 2 Characteristics of children in need: 2014 to 2015 (Statistics: children in need and child  
47  
48 459 protection) year ending 31 March 2015. In: Department for Education National Statistics.  
49  
50 460 2015. Department for Education. [https://www.gov.uk/government/statistics/characteristics-](https://www.gov.uk/government/statistics/characteristics-of-children-in-need-2014-to-2015)  
51  
52 461 [of-children-in-need-2014-to-2015](https://www.gov.uk/government/statistics/characteristics-of-children-in-need-2014-to-2015) Accessed Feb 2016.  
53  
54 462  
55  
56 462 3 MacMillan HL, MacMillan JH, Offord DR, Griffith L, et al. Primary prevention of Child  
57  
58 463 Physical Abuse and Neglect: A Critical Review. *J child psychol psyc* 1994;35(5):835-56.  
59  
60

- 1  
2  
3 464 4 Olds DL, Hill PL, O'Brien R, et al. Taking preventive intervention to scale: The nurse-family  
4  
5 465 partnership. *Cogn behav pract* 2003;10(4):278-90.  
6  
7 466 5 Olds DL, Henderson CR Jr, Chamberlin R, et al. Preventing child abuse and neglect: a  
8  
9 467 randomized trial of nurse home visitation. *Pediatrics* 1986;78: 65–78.  
10  
11 468 6 Kitzman H, Olds DL, Henderson CR, et al. Effect of prenatal and infancy home visitation by  
12  
13 469 nurses on pregnancy outcomes, childhood injuries, and repeated childbearing: a randomized  
14  
15 470 controlled trial. *Jama* 1997;278(8):644-52.  
16  
17 471 7 Olds DL, Robinson J, O'Brien R, et al. Home visiting by paraprofessionals and by nurses:  
18  
19 472 a randomized, controlled trial. *Pediatrics* 2002;110(3):486-96.  
20  
21 473 8 Olds D, Henderson CRJ, Kitzman H, et al. Effects of Prenatal and Infancy Nurse Home  
22  
23 474 Visitation on Surveillance of Child Maltreatment. *Pediatrics* 1995;95(3).  
24  
25 475 9 Owen-Jones E, Bekkers MJ, Butler CC, et al. The effectiveness and cost-effectiveness of  
26  
27 476 the Family Nurse Partnership home visiting programme for first time teenage mothers in  
28  
29 477 England: a protocol for the Building Blocks randomised controlled trial. *BMC Pediatr*  
30  
31 478 2013;13(1):1.  
32  
33 479 10 Robling M, Bekkers MJ, Bell K, et al. Effectiveness of a nurse-led intensive home-  
34  
35 480 visitation programme for first-time teenage mothers (Building Blocks): a pragmatic  
36  
37 481 randomised controlled trial. *The Lancet* 2016;387(10014):146-55.  
38  
39 482 11 Olds DL, Eckenrode J, Henderson CR, et al. Long-term effects of home visitation on  
40  
41 483 maternal life course and child abuse and neglect. Fifteen-year follow-up of a randomized  
42  
43 484 trial. *JAMA* 1997;278(8):637-43.  
44  
45 485 12 Zielinski DS, Eckenrode J, Olds DL. Nurse home visitation and the prevention of child  
46  
47 486 maltreatment: Impact on the timing of official reports. *Dev Psychopathol* 2009;21(02):441-53.  
48  
49 487 13 Data Access Request Service <http://www.hscic.gov.uk/dars>. Accessed March 2016.  
50  
51  
52  
53  
54  
55  
56  
57  
58  
59  
60



- 1  
2  
3 488 14 *International Statistical Classification of Diseases and Related Health Problems, 10<sup>th</sup>*  
4  
5 489 *revision*, Volume 1, Geneva. World Health Organisation 1992.  
6  
7 490 15 National pupil database: apply for a data extract [https://www.gov.uk/guidance/national-](https://www.gov.uk/guidance/national-pupil-database-apply-for-a-data-extract#data-extracts-available)  
8  
9 491 [pupil-database-apply-for-a-data-extract#data-extracts-available](https://www.gov.uk/guidance/national-pupil-database-apply-for-a-data-extract#data-extracts-available). Accessed April 2016.  
10  
11  
12 492 16 Children in need census 2015 to 2016: guide  
13  
14 493 <https://www.gov.uk/government/publications/children-in-need-census-2015-to-2016-guide>  
15  
16 494 Accessed April 2016.  
17  
18 495 17 Children looked after return 2015 to 2016: guide.  
19  
20 496 [https://www.gov.uk/government/publications/children-looked-after-return-2015-to-2016-](https://www.gov.uk/government/publications/children-looked-after-return-2015-to-2016-guide)  
21  
22 497 [guide](https://www.gov.uk/government/publications/children-looked-after-return-2015-to-2016-guide). Accessed April 2016.  
23  
24  
25 498 18 Shaw IG, Holland S. *Doing qualitative research in social work*. Sage; 2014.  
26  
27  
28 499 19 Information Governance Toolkit <https://www.igt.hscic.gov.uk/>. Accessed March 2016.  
29  
30 500 20 Ford DV, Jones KH, Verplancke JP, et al. The SAIL Databank: building a national  
31  
32 501 architecture for e-health research and evaluation. *BMC Health Serv Res* 2009;9(1):157.  
33  
34  
35 502 21 Lyons RA, Jones KH, John G, et al. The SAIL databank: linking multiple health and social  
36  
37 503 care datasets. *BMC Med Inform Decis* 2009;9(1):1.  
38  
39 504 22 Jones KH, Ford DV, Jones C, et al. A case study of the secure anonymous information  
40  
41 505 linkage (SAIL) gateway: A privacy-protecting remote access system for health-related  
42  
43 506 research and evaluation. *J Biomed Inform* 2014;50:196-204.  
44  
45  
46 507 23 Meyn SP, Tweedie RL. *Markov chains and stochastic stability*. Springer Science &  
47  
48 508 Business Media; 2012.  
49  
50 509 24 Chaffin M, Bard D. Impact of intervention surveillance bias on analyses of child welfare  
51  
52 510 report outcomes. *Child maltreatment* 2006;11(4):301-12.  
53  
54  
55 511 25 MacMillan HL, Wathen CN, Barlow J, et al. Interventions to prevent child maltreatment  
56  
57 512 and associated impairment. *The Lancet* 2009;373:250-66.  
58  
59  
60



- 1  
2  
3 513 26 Drummond M, Weatherly H, Claxton K, et al. Assessing the challenges of applying  
4  
5 514 standard methods of economic evaluation to public health interventions. Public Health  
6  
7 515 Research Consortium; 2006. [http://phrc.lshtm.ac.uk/papers/PHRC\\_D1-05\\_Final\\_Report.pdf](http://phrc.lshtm.ac.uk/papers/PHRC_D1-05_Final_Report.pdf)  
8  
9  
10 516 27 National Institute for Health and Care Excellence (2012) Methods for the development of  
11  
12 517 NICE public health guidance (Third edition)  
13  
14 518 <https://www.nice.org.uk/article/pmg4/chapter/1%20introduction>. Accessed October 2016.  
15  
16 519 28 Kelly MP, McDaid D, Ludbrook A and Powell J (2003) Economic appraisal of public  
17  
18 520 health interventions.  
19  
20 521 [http://www.cawt.com/Site/11/Documents/Publications/Population%20Health/Economics%20](http://www.cawt.com/Site/11/Documents/Publications/Population%20Health/Economics%20of%20Health%20Improvement/Economic%20appraisal%20of%20public%20health%20interventions.pdf)  
21  
22 522 [of%20Health%20Improvement/Economic appraisal of public health interventions.pdf](http://www.cawt.com/Site/11/Documents/Publications/Population%20Health/Economics%20of%20Health%20Improvement/Economic%20appraisal%20of%20public%20health%20interventions.pdf).  
23  
24 523 Accessed October 2016.  
25  
26 524 29 National Institute for Health and Care Excellence. Developing NICE guidelines: the  
27  
28 525 manual [PMG20]. October 2014 Updated April 2016 Accessed at  
29  
30 526 [https://www.nice.org.uk/process/pmg20/chapter/incorporating-economic-](https://www.nice.org.uk/process/pmg20/chapter/incorporating-economic-evaluation#approaches-to-bespoke-economic-evaluation)  
31  
32 527 [evaluation#approaches-to-bespoke-economic-evaluation](https://www.nice.org.uk/process/pmg20/chapter/incorporating-economic-evaluation#approaches-to-bespoke-economic-evaluation)  
33  
34 528 30 Methods research to support use of observational data in clinical decision making.  
35  
36 529 [http://www.mrc.ac.uk/funding/how-we-fund-research/highlight-notices/methods-research-](http://www.mrc.ac.uk/funding/how-we-fund-research/highlight-notices/methods-research-observational-data/)  
37  
38 530 [observational-data/](http://www.mrc.ac.uk/funding/how-we-fund-research/highlight-notices/methods-research-observational-data/). Accessed March 2016.  
39  
40 531  
41  
42 532  
43  
44  
45  
46  
47  
48  
49  
50  
51  
52  
53  
54  
55  
56  
57  
58  
59  
60

1  
2  
3 533 *(Title)* Figure 1. Follow up and datasets over the six years

4  
5 534 *(Legend)* A&E Accident and Emergency; PRU Pupil Referral Unit

6  
7 535

8 536

9  
10  
11 537 *(Title)* Figure 2. Governance and Information centre requirements prior to application

12  
13 538 approval.

14  
15 539 *(Legend)* s251 Section 251 of the NHS 2006 Act; ONS Office for National Statistics; NPD

16  
17 540 National Pupil Database; IG Information Governance

18  
19  
20 541

21  
22 542 Figure 3. Data Flow

23  
24 543 *(Legend)* <sup>1</sup>Participant identifiable information securely transferred for linkage; <sup>2</sup>De-

25  
26 544 identification and Standardisation applied (e.g. date of birth to week of birth); <sup>3</sup>Information

27  
28 545 centres confirm matching of participant identifiers; <sup>4</sup>Hosted on SAIL secure platform. ALF-

29  
30 546 Anonymised Linking Field; BB:0-2 – The Building Blocks trial; DfE – Department for

31  
32 547 Education; DPO – Data Providing Organisation; HES – Hospital Episode Statistics; ONS –

33  
34 548 Office for National Statistics; SAIL – Secure Anonymised Information Linkage.

35  
36  
37 549

1  
2  
3  
4  
5  
6  
7  
8  
9  
10  
11  
12  
13  
14  
15  
16  
17  
18  
19  
20  
21  
22  
23  
24  
25  
26  
27  
28  
29  
30  
31  
32  
33  
34  
35  
36  
37  
38  
39  
40  
41  
42  
43  
44  
45  
46  
47  
48  
49  
50  
51  
52  
53  
54  
55  
56  
57  
58  
59  
60

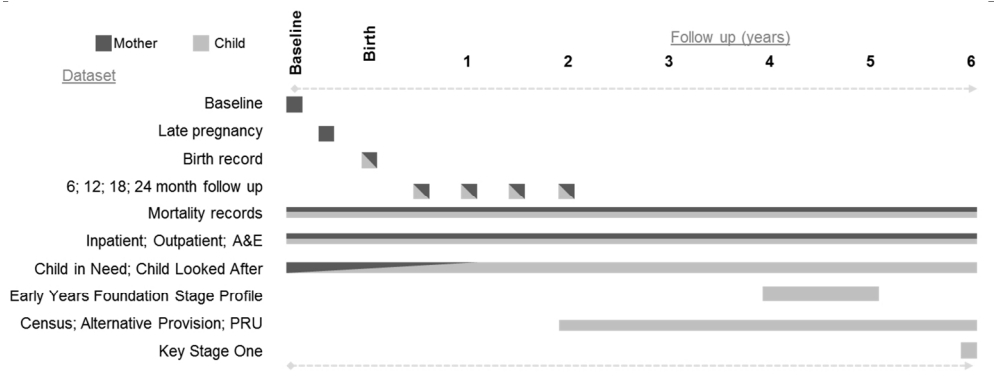

(Title) Figure 1. Follow up and datasets over the six years  
(Legend) A&E Accident and Emergency; PRU Pupil Referral Unit

252x98mm (150 x 150 DPI)

Peer review only

1  
2  
3  
4  
5  
6  
7  
8  
9  
10  
11  
12  
13  
14  
15  
16  
17  
18  
19  
20  
21  
22  
23  
24  
25  
26  
27  
28  
29  
30  
31  
32  
33  
34  
35  
36  
37  
38  
39  
40  
41  
42  
43  
44  
45  
46  
47  
48  
49  
50  
51  
52  
53  
54  
55  
56  
57  
58  
59  
60

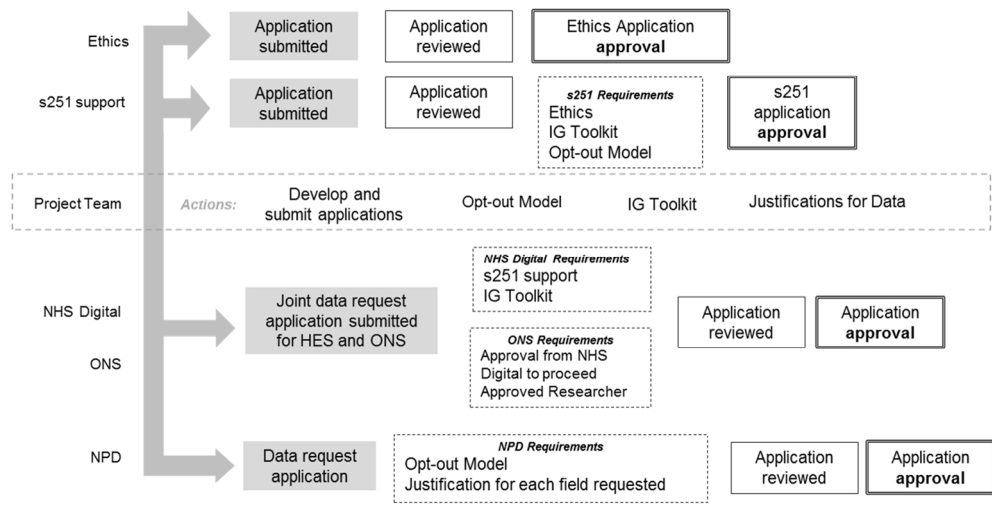

(Title) Figure 2. Governance and Information centre requirements prior to application approval.  
 (Legend) s251 Section 251 of the NHS 2006 Act; ONS Office for National Statistics; NPD National Pupil Database; IG Information Governance

236x127mm (150 x 150 DPI)

Review only

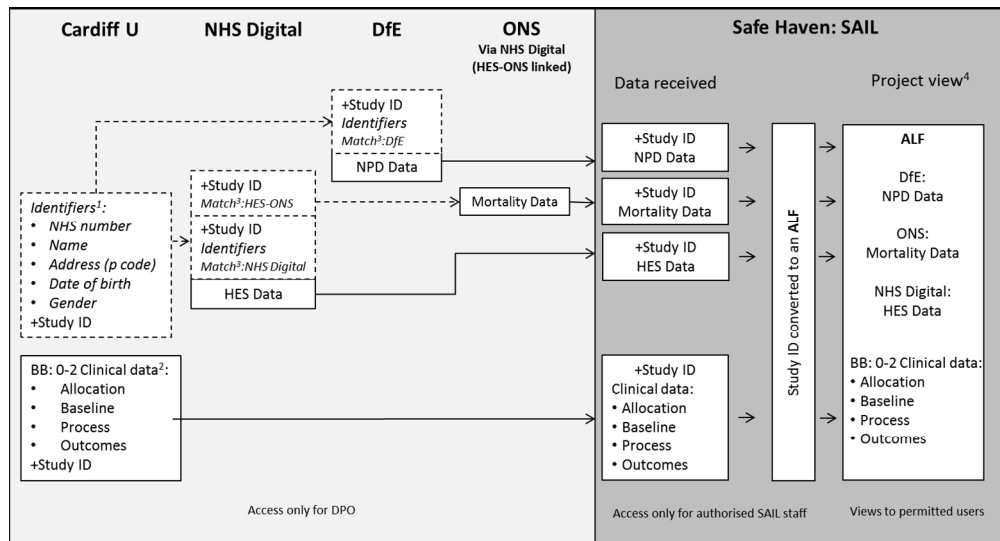

Figure 3. Data Flow

(Legend) 1Participant identifiable information securely transferred for linkage; 2De-identification and Standardisation applied (e.g. date of birth to week of birth); 3Information centres confirm matching of participant identifiers; 4Hosted on SAIL secure platform. ALF- Anonymised Linking Field; BB:0-2 – The Building Blocks trial; DfE – Department for Education; DPO – Data Providing Organisation; HES – Hospital Episode Statistics; ONS – Office for National Statistics; SAIL – Secure Anonymised Information Linkage.

266x143mm (150 x 150 DPI)

view only

# BMJ Open

## Assessing the medium-term impact of a home-visiting programme on child maltreatment in England: protocol for a routine data linkage study

|                                 |                                                                                                                                                                                                                                                                                                                                                                                                                                                                                                                                                                                                                                                                                                                                                                                                                                                                                                                                                                                                                                                                                                                                                                                                             |
|---------------------------------|-------------------------------------------------------------------------------------------------------------------------------------------------------------------------------------------------------------------------------------------------------------------------------------------------------------------------------------------------------------------------------------------------------------------------------------------------------------------------------------------------------------------------------------------------------------------------------------------------------------------------------------------------------------------------------------------------------------------------------------------------------------------------------------------------------------------------------------------------------------------------------------------------------------------------------------------------------------------------------------------------------------------------------------------------------------------------------------------------------------------------------------------------------------------------------------------------------------|
| Journal:                        | <i>BMJ Open</i>                                                                                                                                                                                                                                                                                                                                                                                                                                                                                                                                                                                                                                                                                                                                                                                                                                                                                                                                                                                                                                                                                                                                                                                             |
| Manuscript ID                   | bmjopen-2016-015728.R1                                                                                                                                                                                                                                                                                                                                                                                                                                                                                                                                                                                                                                                                                                                                                                                                                                                                                                                                                                                                                                                                                                                                                                                      |
| Article Type:                   | Protocol                                                                                                                                                                                                                                                                                                                                                                                                                                                                                                                                                                                                                                                                                                                                                                                                                                                                                                                                                                                                                                                                                                                                                                                                    |
| Date Submitted by the Author:   | 30-Mar-2017                                                                                                                                                                                                                                                                                                                                                                                                                                                                                                                                                                                                                                                                                                                                                                                                                                                                                                                                                                                                                                                                                                                                                                                                 |
| Complete List of Authors:       | Lugg-Widger, Fiona; Cardiff University, Centre for Trials Research<br>Cannings John, Rebeca; Cardiff University, Centre for Trials Research<br>Channon, Sue; Cardiff University, Centre for Trials Research<br>Fitzsimmons, Deborah; Swansea University, Swansea Centre for Health Economics<br>Hood, Kerenza; Cardiff University, Centre for Trials Research<br>Jones, Kerina; Swansea University, College of Medicine<br>Kemp, Alison; Cardiff University School of Medicine, Division of Population Medicine<br>Kenkre, Joyce; University of South Wales, 5. Faculty of Life Sciences and Education<br>Longo, Mirella; Cardiff University School of Medicine, Marie Curie Palliative Care Research Centre<br>McEwan, Kirsten; University of Derby, Department of Psychology<br>Moody, Gwenllian; Cardiff University, Centre for Trials Research<br>Owen-Jones, Eleri; Cardiff University, Centre for Trials Research<br>Sanders, Julia; Cardiff University, School of Healthcare Sciences<br>Segrott, Jeremy; Cardiff University, Centre for Trials Research; Cardiff University, DECIPHer Centre, Cardiff School of Social Sciences<br>Robling, Michael; Cardiff University, Centre for Trials Research |
| <b>Primary Subject Heading</b>: | Public health                                                                                                                                                                                                                                                                                                                                                                                                                                                                                                                                                                                                                                                                                                                                                                                                                                                                                                                                                                                                                                                                                                                                                                                               |
| Secondary Subject Heading:      | Health informatics, Paediatrics, Research methods                                                                                                                                                                                                                                                                                                                                                                                                                                                                                                                                                                                                                                                                                                                                                                                                                                                                                                                                                                                                                                                                                                                                                           |
| Keywords:                       | Child maltreatment, Family Nurse Partnership, Early years prevention, Medical Record Linkage, Follow-Up Studies                                                                                                                                                                                                                                                                                                                                                                                                                                                                                                                                                                                                                                                                                                                                                                                                                                                                                                                                                                                                                                                                                             |
|                                 |                                                                                                                                                                                                                                                                                                                                                                                                                                                                                                                                                                                                                                                                                                                                                                                                                                                                                                                                                                                                                                                                                                                                                                                                             |

SCHOLARONE™  
Manuscripts

1  
2  
3 1 Assessing the medium-term impact of a home-visiting programme on child  
4  
5 2 maltreatment in England: protocol for a routine data linkage study  
6  
7  
8  
9  
10

11  
12  
13  
14  
15  
16  
17  
18  
19  
20  
21  
22  
23  
24  
25  
26  
27  
28  
29  
30  
31  
32  
33  
34  
35  
36  
37  
38  
39  
40  
41  
42  
43  
44  
45  
46  
47  
48  
49  
50  
51  
52  
53  
54  
55  
56  
57  
58  
59  
60

4 **Corresponding author**

Fiona Lugg-Widger<sup>1</sup> [LuggFV@cardiff.ac.uk](mailto:LuggFV@cardiff.ac.uk) Telephone: 02920687519

5 Address: 4th Floor Neuadd Meirionnydd, Heath Park, Cardiff. CF14 4YS.  
6

Rebecca Cannings-John<sup>1</sup> [CanningsRL@cardiff.ac.uk](mailto:CanningsRL@cardiff.ac.uk)  
Sue Channon<sup>1</sup> [ChannonS2@cardiff.ac.uk](mailto:ChannonS2@cardiff.ac.uk)  
Deborah Fitzsimmons<sup>2</sup> [D.Fitzsimmons@swansea.ac.uk](mailto:D.Fitzsimmons@swansea.ac.uk)  
Kerenza Hood<sup>1</sup> [HoodK1@cardiff.ac.uk](mailto:HoodK1@cardiff.ac.uk)  
Kerina Jones<sup>3</sup> [k.h.jones@swansea.ac.uk](mailto:k.h.jones@swansea.ac.uk)  
Alison Kemp<sup>4</sup> [KempAM@cf.ac.uk](mailto:KempAM@cf.ac.uk)  
Joyce Kenkre<sup>5</sup> [joyce.kenkre@southwales.ac.uk](mailto:joyce.kenkre@southwales.ac.uk)  
Mirella Longo<sup>6</sup> [LongoM1@cardiff.ac.uk](mailto:LongoM1@cardiff.ac.uk)  
Kirsten McEwan<sup>7</sup> [k.mcewan@derby.ac.uk](mailto:k.mcewan@derby.ac.uk)  
Gwenllian Moody<sup>1</sup> [MoodyG@cardiff.ac.uk](mailto:MoodyG@cardiff.ac.uk)  
Eleri Owen-Jones<sup>1</sup> [Owen-JonesCE@cardiff.ac.uk](mailto:Owen-JonesCE@cardiff.ac.uk)  
Julia Sanders<sup>8</sup> [SandersJ3@cardiff.ac.uk](mailto:SandersJ3@cardiff.ac.uk)  
Jeremy Segrott<sup>1,9</sup> [SegrottJ@cardiff.ac.uk](mailto:SegrottJ@cardiff.ac.uk)  
Michael Robling<sup>1</sup> [RoblingMR@cardiff.ac.uk](mailto:RoblingMR@cardiff.ac.uk)

7  
8 **Author Affiliations**

- 9 1. South East Wales Trials Unit, Centre for Trials Research, Cardiff University, Cardiff, UK.  
10 2. Swansea Centre for Health Economics, Swansea University, Swansea, UK  
11 3. College of Medicine, Swansea University, Swansea, UK  
12 4. Division of Population Medicine, School of Medicine, Cardiff University, Cardiff, UK.  
13 5. Faculty of Life Sciences and Education, University of South Wales, Pontypridd, UK  
14 6. Marie Curie Palliative Care Research Centre, Cardiff University, Cardiff, UK  
15 7. Department of Psychology, University of Derby, UK  
16 8. School of Healthcare Sciences, Cardiff University, Cardiff, UK.  
17 9. DECIPHer Centre, Cardiff School of Social Sciences, Cardiff University, Cardiff, UK.  
18

19 **Word Count:** 4853

20 **Keywords:** Child maltreatment, Family Nurse Partnership, Early years prevention,  
21 Medical Record Linkage, Follow-Up Studies

1  
2  
3 **22 ABSTRACT**  
4

5 **23 Introduction:** Child maltreatment involves acts of omission (neglect) or commission (abuse)  
6  
7  
8  
9  
10  
11  
12  
13  
14  
15  
16  
17  
18  
19  
20  
21  
22  
23  
24  
25  
26  
27  
28  
29  
30  
31  
32  
33  
34  
35  
36  
37  
38  
39  
40  
41  
42  
43  
44  
45  
46  
47  
48  
49  
50  
51  
52  
53  
54  
55  
56  
57  
58  
59  
60

often by caregivers that results in potential or actual harm to a child. The Building Blocks trial [ISRCTN 23019866] assessed the short-term impact of an intensive programme of antenatal and postnatal visiting by specially trained nurses to support young pregnant women in England. The Building Blocks: 2-6 study will assess the medium-term impacts of the programme for mothers and children (n=1562), through the linkage of routinely collected data to the trial data, with a particular emphasis on the programme's impact upon preventing child maltreatment.

**31 Methods and analysis:** We have developed bespoke model of data linkage whereby  
32 outcome data for the trial cohort will be retrieved by linked anonymous data abstraction from  
33 NHS Digital, Office for National Statistics and the Department for Education's National Pupil  
34 Database. Participants will be given reasonable opportunity to opt-out of this study prior to  
35 data transfer. The information centres will match participants to the information held in their  
36 databases using standard identifiers, and send extracts to a third party safe haven. The  
37 study will have 80% power to detect a 4% difference (4% vs 8%) for the binary primary  
38 outcome of Child in Need status (from birth to key stage one) at a two-sided 5% alpha level  
39 by following up 602 children in each trial arm. Analysis will be by intention to treat using  
40 logistic multilevel modelling. A cost and consequences analysis will extend the time-frame of  
41 the economic analysis from the original trial.

**42 Ethics and Dissemination:** The study protocol has been approved by NHS Wales  
43 Research Ethics Committee and the Health Research Authority's Confidentiality Advisory  
44 Group. Methods of innovative study design and findings will be disseminated through peer-  
45 review journals and conferences, results will be of interest to clinical and policy stakeholders  
46 in the UK.

47



## 48 **Strengths and limitations of this study**

- 49 • This study aims to provide much needed evidence about the medium-term benefits of  
50 the Family Nurse Partnership programme in England. This study has the capacity to  
51 either confirm the current perspective on the value of the intervention or demonstrate  
52 clinically meaningful benefits to children in vulnerable young families.
- 53 • There are distinct benefits associated with using routine data including a reduction in  
54 cost and participant burden over prospectively collected data, and relative  
55 completeness and therefore minimisation of bias over self-report, particularly for such  
56 sensitive outcomes.
- 57 • The establishment of a regulatory secure research database for this cohort of trial  
58 participants also offers the prospect of further data being added over the longer term  
59 and of broadening the scope of the dataset to other outcome domains relevant to this  
60 intervention, such as criminal justice and welfare benefits.
- 61 • The extent of this benefit will be balanced by our ability to adequately access the  
62 data from information centres in a timely fashion, the quality of matching conducted  
63 as well as the quality of the data ultimately retrieved.

## 64 **INTRODUCTION**

### 65 **Maltreatment**

66 Child maltreatment involves acts of omission (neglect) or commission (abuse) often by  
67 caregivers that inflict harm, or fail to act to prevent harm to a child.[1] Abuse may be  
68 physical, emotional or sexual. Neglect represents persistent failure to meet basic physical or  
69 psychological needs, often resulting in serious impairment of the child's health and/or  
70 development.[1] Neglect may involve failing to: protect a child from physical and emotional  
71 harm or danger; provide adequate supervision; or ensure access to appropriate medical  
72 care. In the year ending 31st March 2015 in England there were 635,600 referrals to  
73 children's social care services, 403,400 children starting an episode of need (an overall rate

1  
2  
3 74 of 348.0 per 10,000) and 62,200 children became subject of a child protection plan.[2] Of  
4  
5 75 children who became subject of a child protection plan, the most common initial category of  
6  
7 76 abuse was neglect (43.2%) followed by emotional abuse (33.7%).  
8

9  
10 77 In the UK, preventing maltreatment is an important focus of Government concern. The  
11  
12 78 Children Act 1989 specifies agencies' responsibilities to cooperate in the interests of  
13  
14 79 vulnerable children, for Children in Need (section 17) and children suffering or likely to suffer  
15  
16 80 from significant harm (section 47). A child in need is defined as a child who is unlikely to  
17  
18 81 achieve or maintain a reasonable level of health or development, or whose health and  
19  
20 82 development is likely to be significantly or further impaired, without the provision of services;  
21  
22 83 or is a child who is disabled. Local authority provisions may include supervision of activities,  
23  
24 84 financial help, provision of family accommodation, respite or home help in addition to advice  
25  
26 85 and guidance from social workers.  
27

#### 28 86 **Family Nurse Partnership home-visiting programme**

29  
30  
31 87 There has been increasing emphasis upon the primary prevention of child maltreatment,  
32  
33 88 including interventions directed at general populations and those targeting high-risk  
34  
35 89 groups.[3] One such intervention is the Family Nurse Partnership (FNP) programme  
36  
37 90 (developed in the US as the Nurse Family Partnership or NFP) – a home-visiting approach  
38  
39 91 with three overarching goals: to improve birth outcomes, optimise child health and  
40  
41 92 development - including reducing maltreatment - and promote economic self-sufficiency of  
42  
43 93 mothers.[4]  
44

45  
46 94 In three US trials (in Elmira, Memphis and Denver),[5-7] the NFP has demonstrated  
47  
48 95 improvements in prenatal health behaviours and birth outcomes, sensitive child care,  
49  
50 96 maternal life course (e.g. greater workforce participation) and child and adolescent  
51  
52 97 functioning. It has also shown positive effects in relation to reductions in rates of child  
53  
54 98 injuries, abuse and neglect. In the first US trial in 1977, a sub-group analysis of poor  
55  
56 99 unmarried teens (54 families) revealed that by age 2 there was verified abuse / neglect in  
57  
58 100 19% of control children compared to 4% in the group in receipt of NFP in both pregnancy  
59  
60

1  
2  
3 101 and infancy (treatment difference of 0.15, 95% confidence interval of -0.01 to 0.31) and 56%  
4  
5 102 relative reduction in emergency department encounters for injuries and ingestions during the  
6  
7 103 second year of life.[5] Amongst the sub-group of children (56 families) with a state-verified  
8  
9 104 report of maltreatment by age 4, the NFP group of children exhibited fewer risks for harm  
10  
11 105 than the control group (e.g. fewer attendances with injuries / ingestions, safer home  
12  
13 106 environment) at follow-up points between 25 and 50 months of life.[8] This was considered  
14  
15 107 to be due to the earlier and more comprehensive detection of maltreatment by nurse-visited  
16  
17 108 families.

19  
20 109 The NFP programme was adapted for implementation as the Family Nurse Partnership and  
21  
22 110 was introduced in England in 2007. Our Building Blocks trial (ISRCTN23019866) was the  
23  
24 111 first trial of FNP in England and evaluated short-term outcomes to age 2 – the duration of the  
25  
26 112 FNP programme.[9] The trial reported no difference for four primary outcomes: biomarker-  
27  
28 113 calibrated self-reported tobacco use by the mother at late pregnancy, birth weight of the  
29  
30 114 baby, the proportion of women with a second pregnancy within 24 months post-partum, and  
31  
32 115 emergency attendances and hospital admissions for the child within 24 months post-  
33  
34 116 partum.[10] We observed some differences for secondary child development outcomes  
35  
36 117 including the rate of safeguarding events reported in primary care records. While the current  
37  
38 118 evidence does not support continuation of the programme in England, previous evaluations  
39  
40 119 have demonstrated benefit over the longer-term (e.g. up to 15 years of age).[11] For  
41  
42 120 maltreatment outcomes this benefit has been increasingly evident after age 4 years,[12]  
43  
44 121 therefore, the current study will establish whether FNP has moderated maltreatment  
45  
46 122 outcomes over a medium-term period of follow-up (i.e. to the point where the child is aged  
47  
48 123 six years old).

## 52 124 **METHODS AND ANALYSIS**

### 55 125 **Research objective**

1  
2  
3 126 The Building Blocks: 2-6 Study will use data linkage of routinely collected national datasets  
4  
5 127 to assess the medium-term impact of the FNP intervention upon child maltreatment  
6  
7 128 outcomes and key indicators of neglect.  
8  
9

### 10 129 **Study design**

11  
12 130 This is a data linkage study, which will generate a linked anonymised database hosted by an  
13  
14 131 independent Trusted Third Party (TTP). Participant mothers and children from Building  
15  
16 132 Blocks: 0-2 (BB:0-2) will be followed up for a further four years using routine data only. Data  
17  
18 133 from various routine public sector sources will be retrieved and linked to the trial data to  
19  
20 134 enable children and mothers to be followed until the child reaches key stage one (the two  
21  
22 135 years of schooling when pupils are aged between 5 and 7). The study formally started in  
23  
24 136 February 2014 and will report to the funder in May 2018. Participants were recruited to the  
25  
26 137 trial between June 2009, and July 2010 and the six year follow up ends (i.e. the last child will  
27  
28 138 have turned six) in March 2017. A summary of the data sources is provided in Table 1 and  
29  
30 139 the time period for each dataset are shown in Figure 1. Study outcomes are summarised in  
31  
32 140 Table 2.  
33  
34

35 141  
36  
37  
38  
39  
40  
41  
42  
43  
44  
45  
46  
47  
48  
49  
50  
51  
52  
53  
54  
55  
56  
57  
58  
59  
60

142 Table 1. Summary of data sources

| BB: 0-2 | BB: 2-6        | Provided by                             | Dataset           | Time period* | Eligibility / Coverage                                                                    | Mother | Child | Indicative / key data items                                                                                                       |          |
|---------|----------------|-----------------------------------------|-------------------|--------------|-------------------------------------------------------------------------------------------|--------|-------|-----------------------------------------------------------------------------------------------------------------------------------|----------|
| ✓       |                | Trial participants maternal self-report | Baseline          | 2009-2013    | Trial participants                                                                        | Yes    | No    | Socioeconomic; Maternal health & well-being; Health behaviour; pregnancy complications, Neonatal outcomes; Feeding & development. |          |
| ✓       | Late Pregnancy |                                         |                   |              |                                                                                           |        |       |                                                                                                                                   |          |
| ✓       | 6 month        |                                         | Post-birth        |              |                                                                                           |        |       |                                                                                                                                   |          |
| ✓       | 12 month       |                                         |                   |              |                                                                                           |        |       |                                                                                                                                   |          |
| ✓       | 18 month       |                                         |                   |              |                                                                                           |        |       |                                                                                                                                   |          |
| ✓       |                | 24 month                                |                   |              |                                                                                           |        |       |                                                                                                                                   |          |
| ✓       |                | Maternity records                       | Maternal outcomes | 2009-2010    | UK                                                                                        | Yes    | Yes   | Maternal health & well-being; Neonatal outcomes                                                                                   |          |
| ✓       |                | GP records                              | GP consultations  | 2009-2013    | UK                                                                                        | Yes    | Yes   | Immunisations; safeguarding                                                                                                       |          |
| ✓       |                | PCTs                                    | Immunisation      | 2009-2013    | England                                                                                   | No     | Yes   | Immunisations                                                                                                                     |          |
| ✓       | ✓              | DoH                                     | Abortions         | 2009-2013    | England and Wales<br>All abortions performed in the NHS or an approved independent sector | Yes    | No    | Abortions                                                                                                                         |          |
| ✓       | ✓              | ONS                                     | Mortality records | 2009 - 2017  | UK                                                                                        | Yes    | Yes   | Mortality data                                                                                                                    |          |
| ✓       | ✓              | NHS Digital / HES                       | Inpatient;        | 2009 - 2017  | Any NHS hospital in England                                                               | Yes    | Yes   | Injuries and ingestions; subsequent pregnancies;                                                                                  |          |
| ✓       | Outpatient;    |                                         |                   |              |                                                                                           |        |       |                                                                                                                                   |          |
| ✓       | A&E            |                                         |                   |              |                                                                                           |        |       |                                                                                                                                   |          |
|         | ✓              | Dept. for Education / NPD               | CIN;              | 2009 - 2017  | < 18 years<br>Registered with social services in England                                  | Yes    | Yes   | Child in need status and child looked after status                                                                                |          |
|         | ✓              |                                         | CLA               |              |                                                                                           |        |       |                                                                                                                                   |          |
|         | ✓              |                                         | EYFSP             | 2013-2017    | Public Schools in England                                                                 | No     | Yes   | Indicators of maltreatment; educational development and attainment; eligible for free school meals;                               |          |
|         | ✓              |                                         | Census            |              |                                                                                           |        |       |                                                                                                                                   | 4 yrs    |
|         | ✓              |                                         | Alt Provision     |              |                                                                                           |        |       |                                                                                                                                   | 2-19 yrs |
|         | ✓              |                                         | PRU               |              |                                                                                           |        |       |                                                                                                                                   | 2-19 yrs |
|         | ✓              |                                         | Key stage One     | 2016-2017    |                                                                                           | No     | Yes   |                                                                                                                                   |          |

143 \*Trial started 2009; 2 year follow up ended 2013; 6 year follow up ends in 2017. PCTs – Primary Care Trusts ONS- Office for National  
 144 Statistics; HES-Hospital Episode statistics; NPD-national pupil database; CIN-child in need; CLA-child looked after; PRU-pupil referral unit;  
 145 EYFSP-Early Years Foundation Stage Profile DoH – Department of Health

146 Table 2. Study Outcomes

| Domains                                                                                   | Outcomes                            | HES | ONS | NPD |
|-------------------------------------------------------------------------------------------|-------------------------------------|-----|-----|-----|
| <i>Primary:</i><br>Child in Need status recorded at any time during the follow-up period. | CIN status as of 31 March each year |     |     | ✓   |
| <i>Secondary:</i>                                                                         |                                     |     |     |     |
| (i) Objective measures of maltreatment                                                    | Child Protection registration       |     |     | ✓   |
|                                                                                           | Details of a child protection plan  |     |     | ✓   |
|                                                                                           | CIN categorisation                  |     |     | ✓   |
|                                                                                           | CIN duration                        |     |     | ✓   |
|                                                                                           | Looked after status                 |     |     | ✓   |
|                                                                                           | CLA period of care                  |     |     | ✓   |
|                                                                                           | Legal status of CLA                 |     |     | ✓   |
|                                                                                           | Cause of death                      |     | ✓   |     |
| (ii) Associated measures of maltreatment                                                  | DNA appointments                    | ✓   |     |     |
|                                                                                           | Injuries and ingestions             | ✓   |     |     |
| (iii) Intermediate FNP programme outcomes                                                 | Subsequent pregnancies              | ✓   |     |     |
| (iv) Costs                                                                                | Health and Social Care resource use | ✓   |     | ✓   |
| (v) Child health, developmental and educational outcomes                                  | Special Educational Needs           |     |     | ✓   |
|                                                                                           | Disability                          | ✓   |     | ✓   |
|                                                                                           | Day care attendance                 |     |     | ✓   |
|                                                                                           | Early Years assessment              |     |     | ✓   |
|                                                                                           | School attendance                   |     |     | ✓   |
|                                                                                           | Key stage one attainment            |     |     | ✓   |

147 CIN – Child in Need; CLA – Child Looked After; DNA – Did not attend; FNP – Family Nurse  
 148 Partnership; HES – Hospital Episode Statistics; NPD – National Pupil Database; ONS –  
 149 Office for National Statistics

150

### 151 Data providers and datasets

152 The BB:0-2 Trial Data

153 Data collected for the initial trial will be used in the present study.[9-10] A baseline home  
 154 assessment was conducted upon trial entry using Computer-Assisted Personal Interview  
 155 (CAPI). Follow-up was by computer-assisted telephone interview (CATI) at 34-36 weeks  
 156 gestation and 6, 12 and 18 months postnatal. A final home-based CAPI was conducted at 2  
 157 years after birth. Several routinely collected datasets were accessed and data obtained from  
 158 the following sources: maternity records (medical and obstetric history items, antenatal

1  
2  
3 159 attendances and maternal and neonatal outcomes), primary care notes for each mother and  
4  
5 160 child dyad (consultations, immunisations, pregnancies, safeguarding), abortions data from  
6  
7 161 the Department of Health Abortions Statistics Team, and immunisation data via COVER  
8  
9 162 (Cover of Vaccination Evaluated Rapidly) contacts.

10  
11  
12 163 NHS Digital

13  
14 164 The Hospital Episode Statistics (HES) datasets hold records on over 125 million hospital  
15  
16 165 admissions, outpatient and accident and emergency episodes each year. Data can be  
17  
18 166 requested from NHS Digital (formerly known as the Health and Social Care Information  
19  
20 167 Centre), the executive non-departmental public body established under the Health and  
21  
22 168 Social Care Act 2012.[13] All available records belonging to cohort members (mothers and  
23  
24 169 children) will be obtained from study entry of the mother, which occurred between June 2009  
25  
26 170 and July 2010 until the date the child turns six. The data requested include diagnoses,  
27  
28 171 procedures, length of episode and external causes of injuries coded according to the 10<sup>th</sup>  
29  
30 172 revision of the International Statistical Classification of Diseases and Related Health  
31  
32 173 Problems [ICD-10] codes.[14]

33  
34  
35 174 NHS Digital has responsibility for collecting these data from across the health and social  
36  
37 175 care system to allow NHS hospitals to be paid for the care they deliver. At the end of the  
38  
39 176 financial year (March) a final dataset is collated. This dataset is cleaned and validated  
40  
41 177 before being available for research at the end of the year (December).

42  
43  
44 178 Office for National Statistics (ONS)

45  
46  
47 179 The Office for National Statistics (ONS) collects information on cause of death from civil  
48  
49 180 registration records. Mortality data can be accessed through NHS Digital. For registered  
50  
51 181 deaths, the underlying cause of death is derived from the sequence of conditions leading  
52  
53 182 directly to the death and is recorded on the death certificate. Deaths are subsequently coded  
54  
55 183 in line with the ICD-10.

1  
2  
3 184 Department for Education (DfE)  
4

5 185 The Department for Education (DfE) holds information on pupils throughout the different  
6  
7 186 phases of education. Records are sourced from publicly funded schools, local authorities  
8  
9 187 and awarding bodies and held in the National Pupil Database (NPD). Datasets are available  
10  
11 188 on various aspects of education such as school census data, absence data, and school  
12  
13 189 attainment.[15] All available records for the children in the cohort will be obtained from the  
14  
15 190 various datasets held. Data coverage will vary depending on the dataset in question. For  
16  
17 191 example, the School Census returns data on maintained schools (funding and oversight is  
18  
19 192 through the local authority) which represents the majority of schools, Academies (funding  
20  
21 193 and oversight is from the Department for Education), City Technology Colleges, maintained  
22  
23 194 and non-maintained special schools and hospital special schools. Schools that are entirely  
24  
25 195 privately funded and home education are not included in the data, this represents 7% of  
26  
27 196 English students.[16]

28  
29  
30 197 In the UK education is mandatory from the first school term after their 5th birthday. Prior to  
31  
32 198 this, some children may not have received formal early years provision and therefore may  
33  
34 199 not appear in the datasets. A survey conducted in 2014-15 commissioned by Department  
35  
36 200 for Education reported that 25 per cent of children aged 0-4, were not in receipt of any early  
37  
38 201 years' provision. Older preschool children (aged 3 to 4) however, were far more likely to  
39  
40 202 receive early years provision (92%) than younger pre-school children (aged 0 to 2)  
41  
42 203 (61%).[17] We would therefore expect similar coverage rates for this study.

43  
44  
45 204 The data requested includes the number of hours attended, early educational development,  
46  
47 205 eligibility for free school meals, and special educational needs (SEN) provision type.  
48  
49 206 Datasets are collated throughout the year and are available at set time points annually.

50  
51  
52 207 Social Care Data

53  
54  
55 208 Social care data from local authorities is available through the NPD via two datasets, Child in  
56  
57 209 Need (CIN) and Child Looked After (CLA). The CIN census captures individual level  
58  
59  
60



1  
2  
3 210 information on children referred to and assessed by children's social care services within  
4  
5 211 each 12month period.[18] CLA is collected in the SSDA903 return – an annual statutory  
6  
7 212 data collection for all local authorities.[19] Any child in the cohort who is in one of these  
8  
9 213 datasets will be identified. Mothers who were <18 years at the time of participation in the  
10  
11 214 BB:0-2 trial will also be identified in these datasets. There will not be the coverage issues as  
12  
13 215 seen in the education data returns and importantly, the primary outcome will be sourced  
14  
15 216 from these social care datasets.

### 17 **217 Study participants: Inclusion and exclusion criteria**

18  
19  
20 218 Eligible participants are those mothers recruited to the BB:0-2 trial and their first child (or  
21  
22 219 twins, if relevant) and who were not mandatorily withdrawn from the study, or electively  
23  
24 220 withdrew including their consent for use of their data. Women were recruited as nulliparous  
25  
26 221 women aged 19 or under, living in one of 18 local authority FNP catchment areas; recruited  
27  
28 222 by 24<sup>+6</sup> weeks gestation, have conversational level of English and were able to consent to  
29  
30 223 research.[10]

31  
32  
33 224 Children in medium-term foster placements or adopted within the six year study period can  
34  
35 225 be linked up to the date of adoption. Maternal or child death will be captured as an outcome.

### 36 37 38 226 **Recruitment / Dissent**

39  
40  
41 227 Participants previously consented to enter into the BB:0-2 trial and provide self-report and  
42  
43 228 access to their routine records for the period up to two years postpartum. In order to obtain  
44  
45 229 an unbiased estimate of the medium-term effect of FNP on objective and associated  
46  
47 230 maltreatment outcomes we have received section 251 (s251) support of the 2006 NHS Act  
48  
49 231 approval from the Health Research Authority's Confidentiality Advisory Group (HRA CAG) to  
50  
51 232 pass identifiable participant data legally held by Cardiff University to the information centres  
52  
53 233 (IC) to link to routine data. This is without obtaining further consent from participants,  
54  
55 234 instead using an opt-out/dissent model.

56  
57 235 Justification of approach  
58  
59  
60

1  
2  
3 236 Consent for longer-term follow-up (i.e. beyond 24 months postpartum) was originally  
4  
5 237 proposed in the BB:0-2 trial. However, upon ethical review it was considered that greater  
6  
7 238 specificity about exact outcomes than could be provided at recruitment was required.  
8  
9 239 Additionally, providing meaningful consent for much longer follow-up was also challenging,  
10  
11 240 particularly on behalf of yet to be born children.

12  
13 241 Developing the opt-out approach was necessary due to (i) the child protection focus of the  
14  
15 242 study and the consequent sensitivity and impracticality in asking directly for consent, (ii) the  
16  
17 243 mobility and relative difficulty in ongoing direct access to these participants (iii) the  
18  
19 244 consequent introduction of non-ascertainment bias on sample representativeness – resulting  
20  
21 245 in a non-random sample, and (iv) the likely cost and logistical requirements of securing even  
22  
23 246 modest levels of additional consent.

24  
25  
26 247 Methods of notifying participants

27  
28  
29 248 We discussed the issue of dissent and fair processing with the HRA CAG and have  
30  
31 249 subsequently attempted to contact all mothers recruited to the original BB:0-2 trial to inform  
32  
33 250 them that medium-term follow-up using anonymised records will be undertaken.

34  
35 251 Details of participants' residential addresses were updated using their most recent address  
36  
37 252 registered with their GP. Where available, mobile number and email addresses collected  
38  
39 253 for the trial were used to send SMS and emails to participants. All three modes of contact  
40  
41 254 were used over a two-day period and participants were provided with a two-month window in  
42  
43 255 which to contact the project team to discuss the project and opt-out if they wished. A  
44  
45 256 website was also available with the same information which directed participants to contact  
46  
47 257 the project team if they wished.

48  
49  
50 258 *Development of opt-out letter*

51  
52  
53 259 A group of care-experienced young people (CASCADE Voices)[20] advised on the layout,  
54  
55 260 wording and tone of a letter to be sent to all participants. A key consideration was to  
56  
57 261 communicate the focus of this follow-on study in a sensitive manner. The final letter was  
58  
59  
60

1  
2  
3 262 approved by both an NHS Research Ethics Committee and CAG committee as part of  
4  
5 263 overall governance approval for the study. The letter contained both information on the trial,  
6  
7 264 the follow-on study and a flowchart for what to do if women wished to discuss the project  
8  
9 265 and/or opt out.

10  
11 266 *Process to manage dissent*

12  
13  
14 267 Women notifying the study team of their dissent will be recorded as “opted out”, removed  
15  
16 268 from all project datasets for this follow-up work and identifiable datasets to be sent to ICs.  
17  
18 269 They will not be included in any of the datasets or analyses for this follow-on study.

19  
20  
21 270 **Governance and compliance**

22  
23 271 Following Ethical approval (14/WA10062) and s251 support (CAG 10-08(b)/2014), data  
24  
25 272 request applications were submitted to DfE, NHS Digital and ONS.

26  
27  
28 273 In order to satisfy the requirements of the s251 support and NHS Digital contract, the  
29  
30 274 Information Governance (IG) Toolkit self-assessment[21] (commissioned by the Department  
31  
32 275 for Health for NHS Digital to develop and maintain) was required. This organisation-level  
33  
34 276 assessment provides reassurance of satisfactory information governance within the host  
35  
36 277 trials unit. Both the s251 support and IG Toolkit are assessed and renewed on an annual  
37  
38 278 basis. The opt-out model was also required to satisfy s251 support as well as the DfE  
39  
40 279 assessment of compliance with principle one of the Data Protection Act 1998. Governance  
41  
42 280 and IC requirements prior to application approval are shown in Figure 2.

43  
44  
45 281 **Data matching**

46  
47 282 Maternal and child identifiers will be sent to both NHS Digital and DfE for matching with their  
48  
49 283 databases. Each IC holds differing identifiers including a unique identifier for each individual  
50  
51 284 (NHS Number; Unique Pupil Number UPN).

52  
53  
54 285 Matching with HES data will be by exact matching on NHS Number; Date of Birth; Postcode  
55  
56 286 and Gender. This was conducted for BB:0-2 and achieved a high match rate where 99.6%  
57  
58 287 of mothers and babies' records were matched fully (i.e. matched on all identifiers provided)

1  
2  
3 288 or partially (i.e. matched on a reduced, but acceptable number of identifiers provided). This  
4  
5 289 will be repeated for this study. NHS Digital will then exact match with ONS using NHS  
6  
7 290 number in order to obtain mortality data.

8  
9  
10 291 As the NPD does not include NHS numbers, initially exact matching on first name and  
11  
12 292 surname, date of birth and postcode (of both mother and child for social care data; all other  
13  
14 293 datasets just child) will be undertaken. Further matching required will be by fuzzy matching  
15  
16 294 of first name. The CIN and CLA datasets do not contain names or postcodes therefore the  
17  
18 295 matching will be in two phases: i) Participants will be matched with the NPD, the UPN added  
19  
20 296 to all participants and ii) this will be used to identify individuals in the CIN and CLA datasets.

21  
22 297 Data matching at DfE and NHS Digital/ONS are independent therefore match rates at the  
23  
24 298 participant level are expected to vary (some may match to NPD but not HES). Educational  
25  
26 299 records should be available for all children in the trial cohort whereas health and social care  
27  
28 300 derived data will only exist where the child has received a relevant episode of care.  
29  
30 301 Participants will be compared using trial baseline data to check for any bias between those  
31  
32 302 who are matched and not-matched for those datasets where they would all be expected to  
33  
34 303 be present (e.g. school census for all children).

#### 35 36 37 304 The Pseudonymised Dataset

38  
39  
40 305 A unique study ID will be attached to each participant's record prior to data transfer to ICs.  
41  
42 306 Once ICs have matched records to their database, only the unique study ID is retained.  
43  
44 307 Data extracts from both ICs plus data files from the trial (following a process of de-  
45  
46 308 identification and standardisation in Cardiff to reduce risk of later unintentional participant  
47  
48 309 level identification) will all be securely transferred to a data safe haven,[22] the Secure  
49  
50 310 Anonymised Information Linkage (SAIL) databank, for linking and storage. The data flow is  
51  
52 311 shown in Figure 3.

53  
54 312 A SAIL data analyst will re-assign the study ID with a new anonymous linking field [ALF] and  
55  
56 313 store the corresponding ID in a separate encrypted password protected file.[23]  
57  
58  
59  
60

1  
2  
3 314 Participants will not be identifiable to the study team, or to the SAIL analyst, but incoming  
4  
5 315 datasets can be linked at the individual level using the ALF. The study team will have  
6  
7 316 controlled remote access to these data thus ensuring the security of the pseudonymised  
8  
9 317 database.[24] All data cleaning and analysis will be carried out via the remote portal by the  
10  
11 318 study data manager and statistician.

12  
13 319 Data from NHS Digital and NPD will be requested at two time points. The first data extract  
14  
15 320 will confirm the data flow model, assess data quality and the suitability of data for answering  
16  
17 321 key study analyses. The second data request will be made once all children in the study  
18  
19 322 have reached key stage one (April 2017) and on which the study findings will be reported on  
20  
21 323 (in 2018).

22  
23  
24 324 Control of data

25  
26  
27 325 Cardiff University control under contract the identifiable trial data that are being transferred to  
28  
29 326 the ICs and to the safe haven. Data held by NHS Digital, ONS and DfE, for which they are  
30  
31 327 the controllers, are de-identified and then sent to SAIL to be linked and held (including the  
32  
33 328 de-identified trial data) in a secure anonymised standalone database for use by nominated  
34  
35 329 study team members. SAIL will control the safe haven environment, and will process the  
36  
37 330 pseudonymised data for secure use by study team. Cardiff University will control the  
38  
39 331 purposes to which the data are put in answering research questions as per the study  
40  
41 332 protocol. Once linked in the data safe haven, the ability to submit queries to each IC about  
42  
43 333 individual records will be more limited than if identifiable data were returned to the research  
44  
45 334 team in Cardiff. Data cleaning will remain possible however as will generic queries about  
46  
47 335 data provided in batch. The quality of matching conducted by NPD and NHS Digital/ONS will  
48  
49 336 be a key factor in the success of the study.  
50  
51  
52  
53  
54  
55  
56  
57  
58  
59  
60

1  
2  
3 337 **Analysis**  
4

5  
6 338 Power Calculation  
7

8 339 Primary outcome (CIN status at any point between birth and six years): For CIN status,  
9  
10 340 available UK data on rates are not specific to the age-range of interest, but the rate in the  
11  
12 341 general population aged 5-9 years is 4.6% (for local authorities comprising study sites in  
13  
14 342 BB:0-2). The rate of CIN status would be expected to be greater in the specific study  
15  
16 343 sample, and therefore we have assumed a rate of 8%. We hypothesise that FNP would  
17  
18 344 reduce the detection of CIN in the first six years and thus assumed a difference of 4% as  
19  
20 345 being important. To detect a difference of 4% (FNP: 4% vs Usual Care: 8%) would require  
21  
22 346 602 children in each arm (1204 in total) using 80% power and a two-sided 5% alpha level.  
23  
24

25 347 BB:0-2 recruited 1645 women, with 1562 available for follow-up (i.e. excluding those subject  
26  
27 348 to a mandatory withdrawal). Follow-up through medical records (assuming 10% loss in  
28  
29 349 tracking & linkage) would result in 1405 participants, thus securing enough data to test the  
30  
31 350 primary outcome.  
32  
33

34 351 Main analysis  
35  
36

37 352 Analyses will be conducted on an intention-to-treat basis and due emphasis placed on  
38  
39 353 confidence intervals for the between-arm comparisons. Descriptive statistics of demographic  
40  
41 354 and baseline measures will be used to ascertain any marked imbalance between the trial  
42  
43 355 arms. The primary comparative analysis on CIN status at any point between birth and six  
44  
45 356 years will use logistic multilevel modelling to investigate differences between the groups, and  
46  
47 357 odds ratios alongside 95% confidence intervals (CIs) will be reported. Multilevel modelling  
48  
49 358 will allow for clustering of effect within a site and family nurse. Modelling the impact of key  
50  
51 359 subgroups (deprivation, looked after status of mother, adaptive functioning, Not in Education,  
52  
53 360 Employment, or Training (NEET) status and age) and different intervention elements (e.g.  
54  
55 361 gestational age at programme entry, dosage) on outcome will be undertaken by extending  
56  
57  
58  
59  
60

1  
2  
3 362 the primary models and testing for interaction effects. The role of potential moderators of  
4  
5 363 programme effect (e.g. domestic violence) will also be explored.  
6  
7

8 364 Secondary outcomes will assess group differences in objective and associated measures of  
9  
10 365 maltreatment, intermediate FNP programme outcomes as well as child health, development  
11  
12 366 and educational outcomes (as detailed in table 2). The majority of these are binary outcomes  
13  
14 367 (presence/absence of a status, meeting the Key stage one standard or not)) and will be  
15  
16 368 analysed using a multilevel logistic regression model. The distribution of potential continuous  
17  
18 369 outcomes such as Early Year assessment scores will be assessed before analysing using  
19  
20 370 linear regression. Count data such as the number of attendances for injuries and ingestions  
21  
22 371 will be analysed using a Poisson or negative binomial multilevel regression modelling. A  
23  
24 372 detailed statistical plan will be written and signed off prior to any analysis.  
25  
26

27 373 A state transition model using Markov chains will be used to assess the probabilities of  
28  
29 374 moving from one stage marker (states) to another.[25] The transition probabilities (the  
30  
31 375 probability of the various state-changes) in our model will be derived from our data and  
32  
33 376 compared between groups.  
34  
35

36 377 Bias in the followed-up BB:2-6 sample will be quantified by examining group differences  
37  
38 378 (participants and non-participants) in baseline variables such as age, deprivation, gestational  
39  
40 379 age, and education. Surveillance bias in detection of maltreatment during the child's infancy  
41  
42 380 and toddlerhood can be assessed by examining subsequent reporting.[26] The duration  
43  
44 381 between birth and the date of first referral to CSC will be calculated and group differences  
45  
46 382 examined using Cox regression analysis to calculate hazard ratios for referral, together with  
47  
48 383 95% CIs. Surveillance bias is most likely to occur during the intervention phase, although  
49  
50 384 improved handover to other services at 2 years may lead to higher identification in the  
51  
52 385 following year. Severity of the referral will also be compared between the two groups (an  
53  
54 386 approach used in US trials of NFP to explore surveillance bias).  
55

56  
57 387 Health economics  
58  
59  
60



1  
2  
3 388 The economic evaluation will consider costs and consequences of the FNP over the full  
4  
5 389 follow-up period (BB:0-2 & BB:2-6). The current BB:0-2 study reported 1) a within trial cost  
6  
7 390 utility analysis assessing NHS costs against quality adjusted life years (QALY) from the  
8  
9 391 perspective of the mother, and 2) a within trial cost consequences analysis relating all costs  
10  
11 392 (including those to the social care, education and criminal justice sectors as well as health)  
12  
13 393 against the full range of effects.[12] Cost and consequences framework is deemed the most  
14  
15 394 appropriate economic evaluation framework for public health interventions[27] and preferred  
16  
17 395 by NICE[28] because it enables capture of equity consideration as well as intersectoral costs  
18  
19 396 and consequences[29] yet applications are still limited.[27]  
20  
21 397 The absence of additional data on Health Related Quality of Life within the BB2 study means  
22  
23 398 that it will not be possible to estimate QALYs beyond 24 months postpartum and hence  
24  
25 399 extend the within trial cost utility analysis. However, the within trial cost consequences  
26  
27 400 analysis will be extended from 0-2 to 0-6 years through collection of resource use data from  
28  
29 401 medical and education records (including from the latter, data related to social care usage).  
30  
31 402 Costs will be summarised against the range of outcomes collected within BB2 without  
32  
33 403 aggregation to allow weighing up changes in the various outcomes reported in BB2 against  
34  
35 404 the changes in costs in a consistent and transparent manner.[30] This will contribute to  
36  
37 405 providing more robust and valid medium-term estimates within the extended period.  
38  
39  
40  
41

406

## 407 **ETHICS AND DISSEMINATION**

### 408 **Legal & Ethical considerations**

409 The potential for using routine data in health and social care research has been greatly  
47  
48  
49 410 publicised and study designs utilising these data are encouraged by funders.[31] There are,  
50  
51 411 however, many inherent challenges in working with secondary-use data, in particular for this  
52  
53 412 project the ethical and legal requirements/responsibilities which have fundamentally  
54  
55 413 informed this study design.  
56  
57  
58  
59  
60



1  
2  
3 414 Although BB:0-2 linked trial data to HES and ONS data via NHS Digital, the governance  
4  
5 415 requirements around the two applications have differed between the two studies not least  
6  
7 416 because of the difference in consent models. Trial data were provided by NHS Digital and  
8  
9 417 ONS after participant consent to prospective collection and for specified purposes limited to  
10  
11 418 the time-frame of that study. The current follow-on study uses a dissent model under which  
12  
13 419 we are only able to send trial participant identifiers to ICs for matching to outcome data  
14  
15 420 records if there is no objection received from mothers. This is especially important, as  
16  
17 421 following an opportunity to object to being included in the current study, those women who  
18  
19 422 withdrew from the original Building Blocks will be retained. The study will require all clinical,  
20  
21 423 social and educational data to be held in a data safe haven using encrypted record  
22  
23 424 identifiers and analysis via a securely managed and monitored remote portal. The legal  
24  
25 425 bases for transfer of identifiable data to ICs without explicit consent are as follows; s251 of  
26  
27 426 the 2006 NHS Act 2006 for HES data from NHS Digital, s42(4) of the Statistics and  
28  
29 427 Registration Service Act 2007 through NIHR funding for ONS data via NHS Digital, and 6(1)  
30  
31 428 of Schedule 2 of the 1998 Data Protection Act for NPD data.

32  
33  
34 429 *Dissemination of findings* The Building Blocks: 2-6 Study will generate policy-relevant  
35  
36 430 findings describing the medium-term impact of FNP on measurements of child maltreatment.  
37  
38 431 The findings will also include other policy relevant outcomes from the programme such as  
39  
40 432 health care use, education attainment and changes in social care use over the 6 years of  
41  
42 433 follow up. Such medium-term evaluation remains important as some outcomes for the  
43  
44 434 intervention are expected to arise only after the child's second birthday, including  
45  
46 435 maltreatment. This study will either confirm the largely negative trial findings from BB:0-2  
47  
48 436 further weakening the justification for FNP Programme continuation or provide a balance to  
49  
50 437 the early measurable outcomes.

51  
52  
53 438 In addition to reporting the findings to the funder for this study, the funder for the BB:0-2 trial  
54  
55 439 (DH Policy Research Programme) will also be informed and the FNP National Unit (FNPNU).  
56  
57 440 All local authorities in England will be notified of the results, as (since October 2015) they  
58  
59  
60

1  
2  
3 441 have responsibility for commissioning public health services for children aged 0-5.  
4  
5 442 Participants will receive a summary of the results and all reports and publications will be  
6  
7 443 made publicly available in full on the Cardiff University website. The research team have  
8  
9 444 previously convened and met twice with a stakeholder group, including relevant policy leads  
10  
11 445 from each country in the UK delivering FNP (England, Scotland, Northern Ireland). We will  
12  
13 446 stage a similar event to present and discuss the implications for practice and policy of the  
14  
15 447 results of this medium-term follow up of participants.  
16

17  
18 448 In addition to policy and public outputs, academic outputs will include (i) this protocol paper  
19  
20 449 providing visibility of this medium-term follow up, (ii) a methods paper describing the piloting  
21  
22 450 process of the study (including data quality and success of data matching) and (iii) main  
23  
24 451 study findings. We aim to disseminate in high-quality, peer reviewed journals and present in  
25  
26 452 key conferences.  
27

28  
29 453 A particular benefit of this study is understanding of, and learning from, the governance  
30  
31 454 challenges. There is potential to use this method for future trials looking at longer term  
32  
33 455 follow-up. Therefore this study has the potential to add to the understanding of routine data  
34  
35 456 and data linkage methods in future public health and clinical trials and these planned  
36  
37 457 publications will provide a basis for the dissemination of the success of these methods.  
38

39 458 Finally, publishing protocol papers in medical journals were an important innovation for trials.  
40  
41 459 They convey a number of benefits including transparency about what was intended by  
42  
43 460 researchers and therefore comparison to what was actually reported. While protocols are  
44  
45 461 more commonly published for trials, we consider that the protections afforded are similar for  
46  
47 462 other study types. This may include inhibiting 'data dredging' and post-hoc revisions to  
48  
49 463 original study plans. In our study, which links a trial cohort to routine data we consider that  
50  
51 464 this is especially important, particularly because of the broad range of outcomes that are  
52  
53 465 potentially impacted by this complex home visiting intervention.  
54

55  
56 466  
57  
58  
59  
60

467 **Declarations**468 *List of abbreviations*

|                                                                      |
|----------------------------------------------------------------------|
| ALF: anonymous linking field;                                        |
| ALF-E: encrypted ALF;                                                |
| BB:0-2: Building Blocks trial;                                       |
| CAPI: computer-assisted personal interview;                          |
| CATI: computer-assisted telephone interview;                         |
| CIN: Child in Need;                                                  |
| CLA: Child Looked After;                                             |
| DfE: Department for Education;                                       |
| DNA: Did not attend;                                                 |
| DoH: Department of Health;                                           |
| EYFSP: Early Years Foundation Stage Profile;                         |
| FNP: Family Nurse Partnership;                                       |
| FNPNU: Family Nurse Partnership National Unit;                       |
| HES: Hospital Episode Statistics;                                    |
| HRA CAG: Health Research Authority's Confidentiality Advisory Group; |
| HSCIC: Health and Social Care Information Centre;                    |
| IC: information centres;                                             |
| IG: Information Governance ;                                         |
| NEET: Not in Education, Employment, or Training                      |
| NFP: Nurse Family Partnership;                                       |
| NPD: National Pupil Database;                                        |
| ONS: Office for National Statistics;                                 |
| PCT: Primary Care Trusts;                                            |
| PRU: pupil referral unit;                                            |
| QALY: Quality adjusted life years;                                   |
| s251: Section 251 of the NHS 2006 Act;                               |
| SAIL: Secure Anonymised Information Linkage;                         |
| SEN: special educational needs;                                      |
| TTP: trusted third party;                                            |
| UPN: Unique Pupil Number.                                            |

469

470 *Ethics approval and consent to participate* - Ethics approval of the study has been given by  
 471 the Research Ethics Committee for Wales (14/WA10062) and the transfer and use of  
 472 identifiable data has been approved by the Health Research Authority [HRA] Confidentiality  
 473 Advisory Group [CAG] (CAG 10-08(b)/2014).

474 *Consent for publication* - Not Applicable475 *Availability of data and material* - Not Applicable476 *Competing interests* - The authors declare that they have no competing interests

1  
2  
3 477 *Funding* - This project was funded by the National Institute for Health Research Public  
4  
5 478 Health Research (NIHR PHR) Programme (project number 11/3002/11). The views and  
6  
7 479 opinions expressed therein are those of the authors and do not necessarily reflect those of  
8  
9 480 the NIHR PHR Programme or the Department of Health.

10  
11 481 *Authors' contributions*

12  
13  
14 482 MR is the chief investigator of the study. All authors have contributed to and are responsible  
15  
16 483 for the final design of the study. FLW and GM are responsible for study and data  
17  
18 484 management. RCJ is responsible for statistical planning and for data analysis. DF is  
19  
20 485 responsible for the health economics. All authors read and approved the final manuscript.

21  
22  
23 486

24  
25 487 **Acknowledgements**

26  
27  
28 488 The South East Wales Trials Unit is funded by Health and Care Research Wales. The work  
29  
30 489 was undertaken with the support of The Centre for the Development and Evaluation of  
31  
32 490 Complex Interventions for Public Health Improvement (DECIPHer), a UKCRC Public Health  
33  
34 491 Research Centre of Excellence. Joint funding (MR/KO232331/1) from the British Heart  
35  
36 492 Foundation, Cancer Research UK, Economic and Social Research Council, Medical  
37  
38 493 Research Council, the Welsh Government and the Wellcome Trust, under the auspices of  
39  
40 494 the UK Clinical Research Collaboration, is gratefully acknowledged.

41  
42  
43 495

44  
45 496 **References**

46  
47 497 1 A guide to inter-agency working to safeguard and promote the welfare of children. In:  
48  
49 498 Working together to safeguard children. Department for Children Schools and Families.  
50  
51 499 2010.  
52  
53 500 <http://webarchive.nationalarchives.gov.uk/20130401151715/https://www.education.gov.uk/publications/eorderingdownload/00305-2010dom-en-v3.pdf> Accessed Dec 2014.  
54  
55  
56 501

- 1  
2  
3 502 2 Characteristics of children in need: 2014 to 2015 (Statistics: children in need and child  
4 protection) year ending 31 March 2015. In: Department for Education National Statistics.  
5 503  
6 504 2015. Department for Education. [https://www.gov.uk/government/statistics/characteristics-](https://www.gov.uk/government/statistics/characteristics-of-children-in-need-2014-to-2015)  
7  
8 of-children-in-need-2014-to-2015 Accessed Feb 2016.  
9 505
- 10  
11 506 3 MacMillan HL, MacMillan JH, Offord DR, Griffith L, et al. Primary prevention of Child  
12 Physical Abuse and Neglect: A Critical Review. *J child psychol psyc* 1994;35(5):835-56.  
13 507
- 14 508 4 Olds DL, Hill PL, O'Brien R, et al. Taking preventive intervention to scale: The nurse-family  
15 partnership. *Cogn behav pract* 2003;10(4):278-90.  
16 509
- 17 510 5 Olds DL, Henderson CR Jr, Chamberlin R, et al. Preventing child abuse and neglect: a  
18 randomized trial of nurse home visitation. *Pediatrics* 1986;78: 65–78.  
19 511
- 20 512 6 Kitzman H, Olds DL, Henderson CR, et al. Effect of prenatal and infancy home visitation by  
21 nurses on pregnancy outcomes, childhood injuries, and repeated childbearing: a randomized  
22 controlled trial. *Jama* 1997;278(8):644-52.  
23 513  
24 514
- 25 515 7 Olds DL, Robinson J, O'Brien R, et al. Home visiting by paraprofessionals and by nurses:  
26 a randomized, controlled trial. *Pediatrics* 2002;110(3):486-96.  
27 516
- 28 517 8 Olds D, Henderson CRJ, Kitzman H, et al. Effects of Prenatal and Infancy Nurse Home  
29 Visitation on Surveillance of Child Maltreatment. *Pediatrics* 1995;95(3).  
30 518
- 31 519 9 Owen-Jones E, Bekkers MJ, Butler CC, et al. The effectiveness and cost-effectiveness of  
32 the Family Nurse Partnership home visiting programme for first time teenage mothers in  
33 England: a protocol for the Building Blocks randomised controlled trial. *BMC Pediatr*  
34 520  
35 521  
36 522 2013;13(1):1.  
37 523
- 38 524 10 Robling M, Bekkers MJ, Bell K, et al. Effectiveness of a nurse-led intensive home-  
39 visitation programme for first-time teenage mothers (Building Blocks): a pragmatic  
40 randomised controlled trial. *The Lancet* 2016;387(10014):146-55.  
41 525  
42  
43  
44  
45  
46  
47  
48  
49  
50  
51  
52  
53  
54  
55  
56  
57  
58  
59  
60

- 1  
2  
3 526 11 Olds DL, Eckenrode J, Henderson CR, et al. Long-term effects of home visitation on  
4  
5 527 maternal life course and child abuse and neglect. Fifteen-year follow-up of a randomized  
6  
7 528 trial. *JAMA* 1997;278(8):637-43.  
8  
9  
10 529 12 Zielinski DS, Eckenrode J, Olds DL. Nurse home visitation and the prevention of child  
11  
12 530 maltreatment: Impact on the timing of official reports. *Dev Psychopathol* 2009;21(02):441-53.  
13  
14 531 13 Data Access Request Service <http://www.hscic.gov.uk/dars>. Accessed March 2016.  
15  
16 532 14 *International Statistical Classification of Diseases and Related Health Problems, 10<sup>th</sup>*  
17  
18 533 *revision*, Volume 1, Geneva. World Health Organisation 1992.  
19  
20  
21 534 15 National pupil database: apply for a data extract [https://www.gov.uk/guidance/national-](https://www.gov.uk/guidance/national-pupil-database-apply-for-a-data-extract#data-extracts-available)  
22  
23 535 [pupil-database-apply-for-a-data-extract#data-extracts-available](https://www.gov.uk/guidance/national-pupil-database-apply-for-a-data-extract#data-extracts-available). Accessed April 2016.  
24  
25  
26 536 16 Gorard S, Smith E, Benadusi L, et al. Equity in Education: an international comparison of  
27  
28 537 pupil perspectives. Springer 2010.  
29  
30 538 17 Huskinson T, Hobden S, Oliver D et al. Department for Education: Childcare and early  
31  
32 539 years survey of parents 2014 to 2015. 2016  
33  
34  
35 540 18 Children in need census 2015 to 2016: guide  
36  
37 541 <https://www.gov.uk/government/publications/children-in-need-census-2015-to-2016-guide>  
38  
39 542 Accessed April 2016.  
40  
41 543 19 Children looked after return 2015 to 2016: guide.  
42  
43 544 [https://www.gov.uk/government/publications/children-looked-after-return-2015-to-2016-](https://www.gov.uk/government/publications/children-looked-after-return-2015-to-2016-guide)  
44  
45 545 [guide](https://www.gov.uk/government/publications/children-looked-after-return-2015-to-2016-guide). Accessed April 2016.  
46  
47  
48 546 20 Shaw IG, Holland S. Doing qualitative research in social work. Sage; 2014.  
49  
50  
51 547 21 Information Governance Toolkit <https://www.igt.hscic.gov.uk/>. Accessed March 2016.  
52  
53 548 22 Ford DV, Jones KH, Verplancke JP, et al. The SAIL Databank: building a national  
54  
55 549 architecture for e-health research and evaluation. *BMC Health Serv Res* 2009;9(1):157.  
56  
57  
58  
59  
60

- 1  
2  
3 550 23 Lyons RA, Jones KH, John G, et al. The SAIL databank: linking multiple health and social  
4  
5 551 care datasets. *BMC Med Inform Decis* 2009;9(1):1.  
6  
7  
8 552 24 Jones KH, Ford DV, Jones C, et al. A case study of the secure anonymous information  
9  
10 553 linkage (SAIL) gateway: A privacy-protecting remote access system for health-related  
11  
12 554 research and evaluation. *J Biomed Inform* 2014;50:196-204.  
13  
14 555 25 Meyn SP, Tweedie RL. Markov chains and stochastic stability. Springer Science &  
15  
16 556 Business Media; 2012.  
17  
18  
19 557 26 Chaffin M, Bard D. Impact of intervention surveillance bias on analyses of child welfare  
20  
21 558 report outcomes. *Child maltreatment* 2006;11(4):301-12.  
22  
23 559 27 Drummond M, Weatherly H, Claxton K, et al. Assessing the challenges of applying  
24  
25 560 standard methods of economic evaluation to public health interventions. Public Health  
26  
27 561 Research Consortium; 2006. [http://phrc.lshtm.ac.uk/papers/PHRC\\_D1-05\\_Final\\_Report.pdf](http://phrc.lshtm.ac.uk/papers/PHRC_D1-05_Final_Report.pdf)  
28  
29  
30 562 28 National Institute for Health and Care Excellence (2012) Methods for the development of  
31  
32 563 NICE public health guidance (Third edition)  
33  
34 564 <https://www.nice.org.uk/article/pmg4/chapter/1%20introduction>. Accessed October 2016.  
35  
36 565 29 Kelly MP, McDaid D, Ludbrook A and Powell J (2003) Economic appraisal of public  
37  
38 566 health interventions.  
39  
40 567 [http://www.cawt.com/Site/11/Documents/Publications/Population%20Health/Economics%20](http://www.cawt.com/Site/11/Documents/Publications/Population%20Health/Economics%20of%20Health%20Improvement/Economic%20appraisal%20of%20public%20health%20interventions.pdf)  
41  
42 568 [of%20Health%20Improvement/Economic appraisal of public health interventions.pdf](http://www.cawt.com/Site/11/Documents/Publications/Population%20Health/Economics%20of%20Health%20Improvement/Economic%20appraisal%20of%20public%20health%20interventions.pdf).  
43  
44 569 Accessed October 2016.  
45  
46 570 30 National Institute for Health and Care Excellence. Developing NICE guidelines: the  
47  
48 571 manual [PMG20]. October 2014 Updated April 2016 Accessed at  
49  
50 572 [https://www.nice.org.uk/process/pmg20/chapter/incorporating-economic-](https://www.nice.org.uk/process/pmg20/chapter/incorporating-economic-evaluation#approaches-to-bespoke-economic-evaluation)  
51  
52 573 [evaluation#approaches-to-bespoke-economic-evaluation](https://www.nice.org.uk/process/pmg20/chapter/incorporating-economic-evaluation#approaches-to-bespoke-economic-evaluation)  
53  
54 574 31 Methods research to support use of observational data in clinical decision making.  
55  
56 575 [http://www.mrc.ac.uk/funding/how-we-fund-research/highlight-notice/methods-research-](http://www.mrc.ac.uk/funding/how-we-fund-research/highlight-notice/methods-research-observational-data/)  
57  
58 576 [observational-data/](http://www.mrc.ac.uk/funding/how-we-fund-research/highlight-notice/methods-research-observational-data/). Accessed March 2016.  
59  
60

1  
2  
3 577 *(Title)* Figure 1. Follow up and datasets over the six years

4  
5 578 *(Legend)* A&E Accident and Emergency; PRU Pupil Referral Unit

6  
7 579

8 580

9  
10  
11 581 *(Title)* Figure 2. Governance and Information centre requirements prior to application

12  
13 582 approval.

14  
15 583 *(Legend)* s251 Section 251 of the NHS 2006 Act; ONS Office for National Statistics; NPD

16  
17 584 National Pupil Database; IG Information Governance

18  
19  
20 585

21  
22 586 Figure 3. Data Flow

23  
24 587 *(Legend)* <sup>1</sup>Participant identifiable information securely transferred for linkage; <sup>2</sup>De-

25  
26 588 identification and Standardisation applied (e.g. date of birth to week of birth); <sup>3</sup>Information

27  
28 589 centres confirm matching of participant identifiers; <sup>4</sup>Hosted on SAIL secure platform. ALF-

29  
30 590 Anonymised Linking Field; BB:0-2 – The Building Blocks trial; DfE – Department for

31  
32 591 Education; DPO – Data Providing Organisation; HES – Hospital Episode Statistics; ONS –

33  
34 592 Office for National Statistics; SAIL – Secure Anonymised Information Linkage.

35  
36  
37 593



1  
2  
3  
4  
5  
6  
7  
8  
9  
10  
11  
12  
13  
14  
15  
16  
17  
18  
19  
20  
21  
22  
23  
24  
25  
26  
27  
28  
29  
30  
31  
32  
33  
34  
35  
36  
37  
38  
39  
40  
41  
42  
43  
44  
45  
46  
47  
48  
49  
50  
51  
52  
53  
54  
55  
56  
57  
58  
59  
60

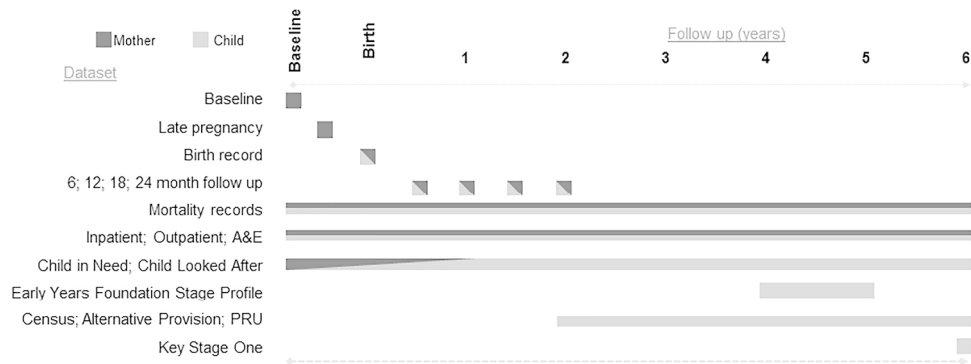

Figure 1. Follow up and datasets over the six years.  
A&E - Accident and Emergency; PRU - Pupil Referral Unit

254x190mm (300 x 300 DPI)

Peer Review Only

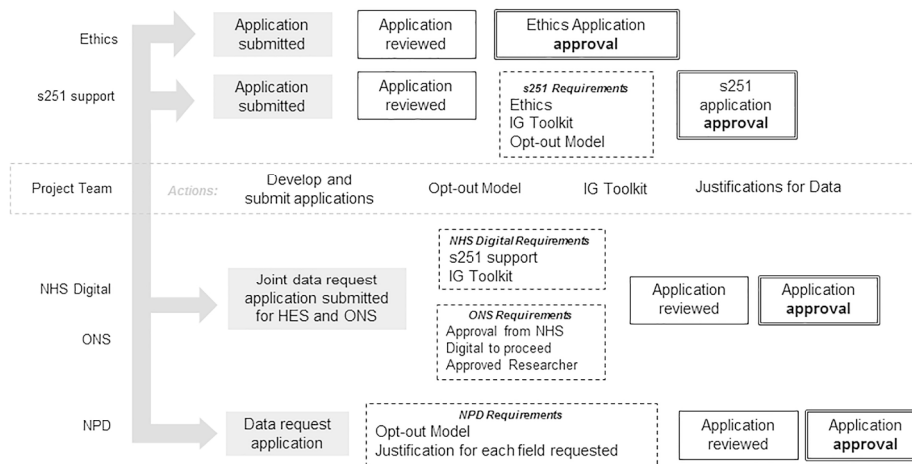

Figure 2. Governance and Information centre requirements prior to application approval. s251 - Section 251 of the NHS 2006 Act; ONS - Office for National Statistics; NPD - National Pupil Database; IG - Information Governance

254x190mm (300 x 300 DPI)

For peer review only

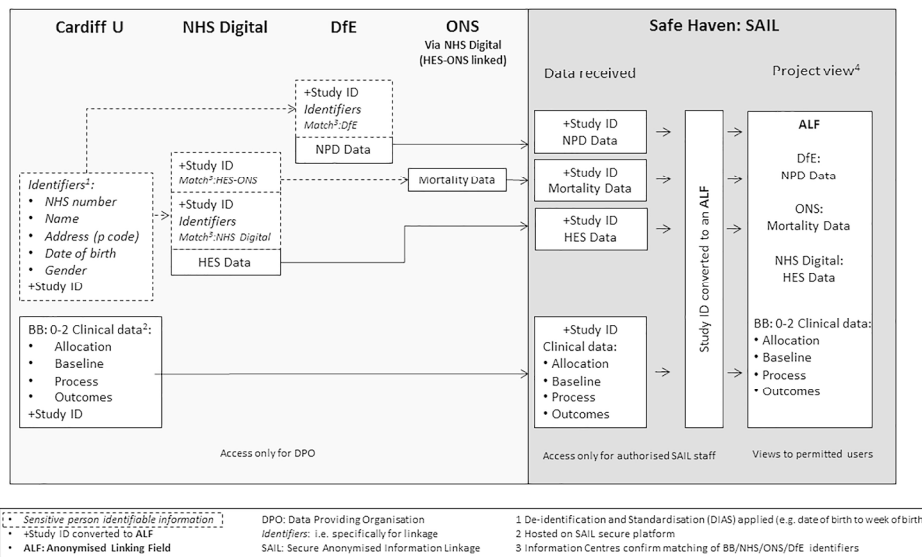

Figure 3. Data Flow.

1 - Participant identifiable information securely transferred for linkage; 2 - De-identification and Standardisation applied (e.g. date of birth to week of birth); 3 - Information centres confirm matching of participant identifiers; 4 - Hosted on SAIL secure platform. ALF- Anonymised Linking Field; BB:0-2 – The Building Blocks trial; DfE – Department for Education; DPO – Data Providing Organisation; HES – Hospital Episode Statistics; ONS – Office for National Statistics; SAIL – Secure Anonymised Information Linkage.

299x190mm (300 x 300 DPI)
